## **Regulation of REM Sleep by Inhibitory Neurons in the Dorsomedial Medulla**

Joseph A. Stucynski<sup>1</sup>, Amanda L. Schott<sup>1</sup>, Justin Baik<sup>1</sup>, Shinjae Chung<sup>1</sup>, Franz Weber<sup>1,\*</sup>

<sup>1</sup>Department of Neuroscience, Perelman School of Medicine, Chronobiology and Sleep Institute, University of Pennsylvania, Philadelphia, PA 19104, USA

\*Correspondence: Franz Weber, [fweber@penncmedicine.upenn.edu](mailto:fweber@penncmedicine.upenn.edu)

## **ABSTRACT**

Mammalian sleep can be subdivided into two distinct brain states, rapid eye movement sleep (REMs) and non-REM sleep (NREMs). Each state is characterized by distinct brain rhythms ranging from millisecond to minute-long (infraslow) oscillations. The mechanisms controlling transitions between sleep states and how they are synchronized with infraslow brain rhythms remain poorly understood. Here, we show that GABAergic neurons in the dorsomedial medulla (dmM) promote the initiation and maintenance of REMs, in part through their projections to the dorsal and median raphe nuclei. Calcium imaging using fiber photometry demonstrated that dmM GABAergic neurons are strongly activated during REMs. During NREMs, their activity fluctuated in close synchrony with infraslow oscillations in the sigma power of the electroencephalogram (EEG). Together, these findings functionally and anatomically delineate a specific population of medullary neurons that powerfully control REMs. The slow oscillations in the activity of the dmM neurons may serve as a physiological link coordinating transitions from NREMs to REMs with infraslow brain rhythms.



## INTRODUCTION

Mammalian sleep comprises two major substages: rapid eye movement sleep (REMs) and non-REM sleep (NREMs). Both stages are characterized by distinct oscillations in the electroencephalogram (EEG) that typically reside in the sub-second range, such as slow waves, sleep spindles, and hippocampal theta oscillations (Adamantidis et al., 2019; Saper et al., 2010; Scammell et al., 2017). In addition to these fast oscillations, the sleep architecture is also shaped by much slower processes such as the ultradian NREMs/REMs cycle or infraslow rhythms operating on a minute timescale (Fernandez and Lüthi, 2019; Lecci et al., 2017; Terzano et al., 1985; Watson, 2018). During NREMs, the EEG follows a distinct infraslow (~0.02 Hz) oscillation in the sigma range, which plays a prominent role in timing transitions from NREMs to wakefulness (Lecci et al., 2017). However, the mechanisms by which infraslow processes interact with sleep circuits to coordinate brain state transitions, particularly NREMs to REMs transitions, remain largely unknown.

Neural circuits involved in regulating transitions from NREMs to REMs have been identified in the hypothalamus and brainstem, including pons and medulla (Luppi et al., 2012; Park and Weber, 2020; Peever and Fuller, 2017; Saper et al., 2010; Scammell et al., 2017). Within the medulla, GABAergic neurons located in its ventral part have been shown to strongly promote REMs, partly through inhibition of REMs-suppressing (REMs-off) neurons in the ventrolateral periaqueductal gray (vlPAG) within the midbrain (Weber et al., 2015). In addition to the ventral medulla, the dorsomedial medulla (dmM) has also been implicated in REMs control (Clément et al., 2012; Clément et al., 2014, Gervasoni et al., 2000; Goutagny et al., 2008; Kaur et al., 2001; Sakai, 2018; Sapin et al., 2009; Verret et al., 2006). Electrophysiological *in vivo* recordings in rodents demonstrated the existence of REMs-active neurons in both the nucleus prepositus hypoglossi (PH) and the dorsal paragigantocellular reticular nucleus (DPGi) (Goutagny et al., 2008; Sakai, 2018), and pharmacological inhibition of DPGi neurons expressing adrenergic alpha2-receptors specifically reduced the amount of REMs (Clément et al., 2014). Inhibitory neurons in PH and DPGi are thought to promote REMs by inhibiting REMs-off neurons in the pons and midbrain, within the locus coeruleus (LC), dorsal raphe (DRN), and vlPAG (Ennis and Aston-Jones, 1989; Gervasoni et al., 2000; Goutagny et al., 2008; Clément et al., 2012; Sapin et al., 2009; Verret et al., 2006). DPGi GABAergic neurons, and neurons within this area that project to the vlPAG or LC, express high levels of the immediate early gene c-Fos after deprivation-induced REMs rebound, suggesting a strong activation during REMs (Clément et al., 2012; Sapin et al., 2009; Verret et al., 2006). However, the slow time course of c-Fos expression lacks the temporal precision to resolve activity changes associated with fast brain state transitions. Moreover, electrical stimulation of the PH resulted in an increased amount of REMs, an effect which could be reversed by pharmacological inhibition of the LC (Kaur

et al., 2001), but non-specific activation of axons-of-passage causing this effect cannot be ruled out. Although these studies suggest an important role of dmM inhibitory neurons in REMs regulation, their precise role in initiating and maintaining REMs and the underlying circuit mechanisms are still not fully understood. Furthermore, since the oscillation in EEG sigma power influences the timing of awakenings from NREMs (Lecci et al., 2017), an interesting question is whether this infraslow rhythm is also involved in timing transitions from NREMs to REMs, possibly by influencing REMs-regulatory circuits such as the dmM inhibitory neurons.

In this study, we show that optogenetic activation of GABAergic, GAD2-expressing neurons in the dmM powerfully promotes the initiation and maintenance of REMs. The REMs-promoting effect was in part mediated by dmM neurons that project to the dorsal and median raphe (DR/MRN). Using fiber photometry, we found that dmM neurons are strongly activated during REMs. During NREMs their activity closely followed the infraslow oscillation in the EEG sigma power. Optogenetic activation was most efficient in triggering REMs with minimal delay when it coincided with the falling phase of the infraslow oscillation. Our findings delineate the role of dmM inhibitory neurons in REMs control and suggest a mechanism by which infraslow oscillations contribute to the timing of NREMs to REMs transitions.

## RESULTS

### **Optogenetic activation of dmM GAD2 neurons powerfully promotes REMs.**

To probe the role of dmM GAD2 neurons in sleep-wake control, we injected Cre-inducible adeno-associated viruses (AAVs) expressing channelrhodopsin-2 fused with enhanced yellow fluorescent protein (AAV-DIO-ChR2-eYFP) into the dmM of GAD2-Cre mice (**Fig. 1a**). ChR2-eYFP was consistently expressed in the PH and DPGi across mice and to a lesser extent in neighboring areas including the medial vestibular nucleus (MV) and nucleus of the solitary tract (NST) (**Fig. 1a,b**). The optic fibers for laser stimulation were consistently placed on top of the PH (**Suppl. Fig. 1a**). While recording the animal's brain state using electroencephalogram (EEG) and electromyogram (EMG) signals, laser stimulation (10 Hz, 120 s per trial) was applied randomly every 10 to 20 minutes (**Fig. 1c**). We found that optogenetic activation of dmM GAD2 neurons strongly increased the percentage of REMs during the laser stimulation interval ( $P < 0.001$ , bootstrap,  $n = 9$  mice), while NREMs was reduced (**Fig. 1d**;  $P < 0.001$ ). The percentage of wakefulness was also enhanced ( $P < 0.001$ ), but increased at a slower rate than REMs. In control mice expressing eYFP only, laser stimulation did not significantly alter the brain state (**Suppl. Fig. 1b**,  $P > 0.233$ ,  $n = 7$  mice). Consistent with the strong REMs-promoting effect, the mean EEG spectrogram averaged across

laser trials displayed a distinct increase in both theta and gamma power with a concomitant power reduction in the delta and sigma ranges during laser stimulation (**Fig. 1e**; delta,  $P = 3.5e-5$ ,  $T = -8.26$ ; theta,  $P = 0.007$ ,  $T = 3.60$ ; sigma,  $P = 0.001$ ,  $T = -4.91$ ; gamma,  $P = 6.8e-5$ ,  $T = 7.52$ ; paired t-test,  $n = 9$  mice).

The effect of optogenetically activating dmM GAD2 neurons on the EEG was brain state dependent. The power spectral density of the EEG during laser-induced REMs episodes was indistinguishable from that during spontaneous REMs, without significant changes in the delta, theta, or sigma power (**Fig. 1f**; REM,  $P > 0.48$  for delta, theta, and sigma; paired t-test,  $n = 9$  mice, **Suppl. Fig. 1c**;) and the EMG amplitude was similarly unchanged (**Suppl. Fig. 1e**;  $P = 0.11$ , paired t-test). In contrast, laser stimulation strongly reduced the EEG delta power during both NREMs and wakefulness and increased the NREMs theta power (**Fig. 1f**; NREM, delta,  $P = 0.00025$ ,  $T = -6.22$ ; theta,  $P = 0.001$ ,  $T = 5.04$ ; Wake, delta,  $P = 0.0001$ ,  $T = -6.88$ ; paired t-test). Activation of dmM neurons during NREMs thus caused changes in the EEG resembling two defining features of REMs: reduced delta and increased theta power, which also precede spontaneous NREMs to REMs transitions (Gottesmann, 1996) (**Suppl. Fig. 1c**).

Next, to determine whether the changes in the percentage of a specific brain state during laser stimulation are due to changes in the induction or maintenance of that state, we quantified how the laser affected the transition probability between each pair of brain states. Activation of dmM neurons caused an increase in NREMs to REMs transitions (NREM  $\rightarrow$  REM,  $P < 0.001$ , bootstrap,  $n = 9$  mice), enhanced REMs to REMs transitions (REM  $\rightarrow$  REM,  $P < 0.001$ ), and suppressed REMs to wake transitions (**Fig. 1g**; REM  $\rightarrow$  Wake,  $P < 0.001$ ), suggesting that dmM GAD2 neurons promote both the initiation and maintenance of REMs. Interestingly, in rare instances laser stimulation also promoted transitions from wakefulness to REMs (Wake  $\rightarrow$  REM,  $P < 0.001$ ). In each of these cases, the wake period interrupted two successive REMs episodes (**Suppl. Fig. 1d,f**).

In addition, optogenetic activation also promoted wake to wake transitions (Wake  $\rightarrow$  Wake,  $P < 0.001$ ), while the probability of NREMs to wake transitions was unchanged (**Fig. 1g**; NREM  $\rightarrow$  Wake,  $P = 0.27$ ). Hence, the increase of the wake percentage during laser stimulation was due to an enhanced maintenance (instead of induction) of wakefulness. Immediately after cessation of laser stimulation, the probability of NREMs to wake transitions was briefly increased (NREM  $\rightarrow$  Wake,  $P < 0.001$ , bootstrap), possibly due to a rebound in the activity of wake-promoting neurons such as adrenergic/noradrenergic neurons, which have been shown to be inhibited by the dmM (Clément et al., 2014; Verret et al., 2006). Taken together, our optogenetic activation experiments therefore suggest that dmM GAD2 neurons both initiate and maintain REMs and are also involved in the maintenance of wakefulness.

### **dmM GAD2 neurons maintain REMs.**

The transition analysis indicated that activation of dmM GAD2 neurons prolongs REMs (REM → REM, **Fig. 1g**). To more directly test the role of these neurons in REMs maintenance, we applied optogenetic closed-loop stimulation (**Fig. 2a,b**). The brain state of the animal was classified based on real-time analysis of the EEG/EMG signals. As soon as the onset of a spontaneous REMs episode was detected, laser stimulation was initiated, and stayed on until the episode ended. The laser was turned on randomly for only 50% of the detected REMs episodes. Optogenetic closed-loop activation of dmM neurons strongly prolonged the duration of REMs episodes overlapping with laser stimulation (**Fig. 2c**; no laser, 63.5 s; laser, 118.5 s;  $P = 0.0003$ ,  $T = 11.70$ , paired t-test,  $n = 5$  mice). In contrast, closed-loop stimulation in eYFP control mice had no significant effect on the REMs duration (no laser, 86.7 s; laser, 88.3 s;  $P = 0.80$ ,  $T = 0.27$ , paired t-test,  $n = 6$  mice) (**Suppl. Fig. 2a**). These results further demonstrate a prominent role of dmM GAD2 neurons in powerfully maintaining REMs.

As shown in multiple mammalian species, the interval between two successive REMs periods (inter-REM interval) is positively correlated with the preceding REMs duration, largely due to a larger amount of NREMs following longer REMs episodes (Barbato and Wehr, 1998; Benington and Heller, 1994; Ursin, 1970; Vivaldi et al., 1994). This correlation provides evidence for a homeostatic process regulating the timing of REMs episodes on the ultradian timescale (Benington and Heller, 1994; Le Bon, 2020; Ocampo-Garcés et al., 2000, 2020); in the absence of REMs, a homeostatic pressure builds up and is dissipated in proportion to the duration of the subsequent REMs episode. As further support for the homeostatic regulation of REMs, we found that REMs periods overlapping with laser stimulation were followed by a larger amount of NREMs during the subsequent inter-REM interval, while the amount of wakefulness was not significantly altered (**Fig. 2d**; NREM,  $P = 0.009$ ,  $T = 4.71$ ; Wake,  $P = 0.350$ ,  $T = -1.06$ , paired t-test,  $n = 5$  mice). These findings suggest that REMs pressure is discharged more during REMs periods extended by laser stimulation, requiring a longer duration of subsequent NREMs to accumulate sufficient pressure to re-enter REMs.

### **DR/MRN-projecting dmM neurons specifically promote REMs.**

Our optogenetic experiments showed that activation of dmM GAD2 neurons both promotes REMs and maintains wakefulness. We hypothesized that the effects on REMs and wakefulness may be mediated by different subpopulations within the dmM. Furthermore, we reasoned that the axons of REMs-promoting dmM neurons may project to areas containing REMs-suppressing (REMs-off) neurons. Anterograde tracing using Chr2-eYFP revealed strong axonal projections of the dmM GAD2 neurons to the dorsal and median raphe nuclei (DR/MRN) at the midbrain/pons boundary and only

sparse projections to the vIPAG (**Fig. 3a**). A recent study has shown that tonic optogenetic activation of serotonergic neurons in the DR/MRN strongly suppresses REMs, while maintaining NREMs (Oikonomou et al., 2019); an effect comparable to that of stimulation of vIPAG GABAergic neurons, which form another prominent group of REMs-off neurons in the midbrain (Hayashi et al., 2015; Kaur et al., 2009; Lu et al., 2006; Sapin et al., 2009; Vanini et al., 2007; Weber et al., 2018). To specifically express ChR2-eYFP in the subpopulation of dmM GAD2 neurons projecting to the raphe nuclei we injected an AAV with high retrograde efficiency (AAVrg-DIO-ChR2-eYFP) into the DR/MRN (Tervo et al., 2016) (**Fig. 3b**). Within the dmM, the retrogradely labeled neurons were clustered within the PH next to the 4th ventricle (**Fig. 3c**).

Optogenetic activation of the DR/MRN-projecting dmM neurons (10 Hz, 120 s per trial) strongly increased the percentage of REMs during laser stimulation (**Fig. 3e**;  $P < 0.001$ , bootstrap,  $n = 9$  mice) with magnitudes comparable to those observed for stimulation of the whole dmM population ( $P = 0.16$ ,  $T = 1.48$ , unpaired t-test) and also reduced NREMs ( $P < 0.001$ ). The laser trial averaged EEG spectrogram similarly showed for stimulation of the projection neurons a distinct increase in theta and gamma power with a concomitant reduction in both the delta and sigma power (**Fig. 3f**; delta,  $P = 4.1e-5$ ,  $T = -8.06$ ; theta,  $P = 6.8e-3$ ,  $T = 3.6$ ; sigma,  $P = 0.004$ ,  $T = -3.92$ ; gamma,  $P = 7.1e-4$ ,  $T = 5.32$ , paired t-test) and optogenetic activation also increased the EEG delta and theta power during NREMs (**Fig. 3g**; NREM: delta,  $P = 0.0012$ ,  $T = -4.88$ ; theta,  $P = 0.0027$ ,  $T = 4.27$ , paired t-test). Interestingly, in contrast to activation of the whole dmM GAD2 population (**Fig. 1**), stimulation of the DR/MRN-projecting neurons did not increase the percentage of wake during the laser interval (**Fig. 3e**;  $P = 0.32$ , bootstrap) and wake to wake transitions were not significantly altered (**Fig. 3h**; Wake  $\rightarrow$  Wake,  $P = 0.21$ , bootstrap). This suggests that the subpopulation of DR/MRN-projecting dmM neurons specifically promotes REMs and does not maintain wakefulness.

Consistent with the strong REMs-promoting effect, activation of the DR/MRN-projecting neurons enhanced both NREMs to REMs and REMs to REMs transitions demonstrating that these neurons both induce and maintain REMs (**Fig. 3h**; NREM  $\rightarrow$  REM,  $P < 0.001$ ; REM  $\rightarrow$  REM,  $P < 0.001$ ). Closed-loop stimulation of the projection neurons during REMs confirmed the REMs-promoting effect (**Suppl. Fig. 3e**; no laser, 55.7 s; laser, 109.8 s;  $P = 0.022$ ,  $T = 3.27$ , paired t-test,  $n=6$  mice) and REMs periods extended by laser stimulation also increased the total duration of NREMs but not wake during the subsequent inter-REM interval (**Suppl. Fig. 3e**; NREM,  $P = 0.032$ ,  $T = 2.95$ ; Wake,  $P = 0.186$ ,  $T = 1.53$ , paired t-test). Taken together, these results demonstrate that by using an AAV for retrograde labeling of DR/MRN-projecting neurons, we could isolate a subpopulation of dmM GAD2 neurons within the PH that was sufficient for both the initiation and maintenance of REMs.



### **Fiber photometry imaging of dmM GAD2 neurons.**

Electrophysiological *in vivo* recordings demonstrated the existence of highly REMs-active neurons in the dmM (Goutagny et al., 2008; Sakai, 2018). Since the dmM contains multiple different cell types (Girard et al., 2020), it is necessary to perform cell-type specific recordings to unravel the state-dependent activity of the GABAergic neurons. To monitor the dynamics of dmM GAD2 neurons *in vivo* during spontaneous sleep, we recorded their population activity using fiber photometry (Lerner et al., 2015).

We injected Cre-dependent AAVs encoding the fluorescent calcium indicator GCaMP6s (AAV-Flex-GCaMP6s) into the dmM of GAD2-Cre mice and implanted an optic fiber to measure the calcium dependent fluorescence of GCaMP6s (**Fig. 4a,b; Suppl. Fig. 4b**). In all mice, the calcium activity of the dmM GAD2 neurons was significantly modulated by the brain state (**Fig. 4c**;  $P < 0.05$ , one-way ANOVA,  $n = 6$  mice). In 5 out of 6 mice, the dmM GAD2 neurons were most active during REMs ( $P < 0.05$ , Tukey post-hoc test); in the remaining mouse, the activity was highest during both REMs and wake. Analyzing the calcium changes at brain state transitions, we found that the activity of dmM GAD2 neurons started increasing 35 s before the onset of REMs ( $P < 0.05$ , paired t-test with Bonferroni correction; **Suppl. Fig. 4a**). Their activity persisted throughout REMs at high levels and started being suppressed 5 s before its termination ( $P < 0.05$ ). This activity profile further suggests that these neurons contribute to REMs initiation and maintenance during natural sleep.

### **The activity of dmM neurons closely follows EEG sigma power.**

Interestingly, during NREMs the calcium activity of the dmM GAD2 neurons rhythmically fluctuated on an infraslow timescale of tens of seconds (**Fig. 4b**). A recent study showed that the EEG displays an oscillation in the sigma power on a similar timescale (Lecci et al., 2017). Consequently, we wondered whether the rhythmic activity of the dmM inhibitory neurons during NREMs may follow this infraslow oscillation. We indeed found that the EEG sigma power and calcium activity of dmM GAD2 neurons were strongly positively correlated during NREMs (**Fig. 4b,d; Suppl. Fig. 4c**;  $P = 1.6e-5$ ,  $T = 16.17$ , paired t-test) and the spectral density of both the calcium activity and sigma power consequently peaked at a comparable frequency (**Suppl. Fig. 4d**,  $P = 0.695$ ,  $T = 0.41$ , paired t-test). The cross correlation of the two signals was maximal at  $0.75 \text{ s} \pm 0.32 \text{ s}$  (mean  $\pm$  s.d.) (**Fig. 4d**), indicating that the dmM population activity followed the cortical sigma power with short time delay. The correlation between the two signals was strongest during NREMs (**Suppl. Fig. 4c**;  $P = 2.0e-6$ ,  $F(2, 10) = 65.32$ , one-way repeated-measures ANOVA;  $P < 7.7e-9$ , Bonferroni correction,  $n = 6$  mice) and the signals were anti-correlated during wakefulness (**Suppl. Fig. 4c**;  $P = 1.05e-4$ ,  $T = 16.17$ , t-test). Compared with the delta and theta power, the correlation was strongest

for the sigma power (**Fig. 4c**; one-way repeated-measures ANOVA,  $P = 1.41e-07$ ,  $F(2, 10) = 151.47$ ; Bonferroni correction,  $P < 1.15e-4$ ).

Next, we analyzed the dmM activity throughout single sigma oscillation cycles during consolidated bouts of NREMs (NREMs bouts lasting at least 120 s and only interrupted by microarousals, i.e. wake episodes  $\leq 10$  s). The  $\Delta F/F$  activity showed a cosine-shaped activity modulation and closely matched the time course of the sigma power (**Fig. 4e**). Moreover, we found that the calcium activity differed during sigma power cycles depending on whether the mouse transitioned to wake or REMs (**Fig. 4f**;  $P = 0.045$ ,  $F(20,100) = 4.017$ ,  $n = 6$  mice, one-way repeated-measures ANOVA). Preceding a transition to wakefulness, the dmM neuronal population again exhibited a cosine-like rise and decay in its activity (**Fig. 4f**). In contrast, before a transition to REMs, the  $\Delta F/F$  signal raised more steeply and stayed elevated throughout the remaining infraslow cycle before peaking during REMs (**Fig. 4f**), indicating that the activity of the dmM GAD2 population during a single infraslow cycle is predictive of whether the animal will transition to REMs or wakefulness.

In addition to the infraslow timescale, we found that the activity of dmM neurons is also modulated on the ultradian timescale. To quantify the ultradian modulation of the calcium signal, we normalized the duration of inter-REM intervals to compare changes of the dmM activity across these intervals. Consistent with an accumulation of REMs pressure during NREMs, the NREMs calcium activity progressively increased throughout inter-REM intervals ( $P = 6.85e-7$ ,  $R = 0.31$ , linear regression fit), while the activity during wake decayed (**Suppl. Fig 4e**;  $P = 0.006$ ,  $R = -0.20$ , linear regression fit). Longer REMs periods are thought to more strongly dissipate REMs pressure. Accordingly, the duration of REMs periods was negatively correlated with the activity of dmM neurons during NREMs (**Suppl. Fig. 4f**;  $P = 0.029$ ,  $R = -0.308$ , linear regression fit); the longer the preceding REMs episode, the less active the dmM neurons during inter-REM NREMs. In contrast, the activity during wakefulness was not significantly modulated by the preceding REMs duration (**Suppl. Fig. 4f**;  $P = 0.846$ ,  $R = -0.028$ , linear regression fit), in line with the idea that REMs pressure accumulates during NREMs (Benington and Heller, 1994).

In the optogenetic stimulation experiments of dmM GAD2 and DR/MRN-projecting GAD2 neurons (**Figs. 1, 3**), the delay between laser onset and the start of laser-induced REMs episodes considerably varied across trials (**Fig. 5a**). Given the strong modulation of dmM GAD2 neurons by the sigma power, we wondered whether the phase of infraslow oscillation at laser onset may influence these delay times. As the infraslow oscillation in sigma power is particularly pronounced during consolidated NREMs (**Fig. 5b**) (Lecci et al., 2017), we restricted our analysis to laser trials preceded by at least 2 min of NREMs (only interrupted by microarousals) (**Fig. 5c**). We found that the delay between laser onset and REMs indeed depended on the

phase of the infraslow oscillation (**Fig. 5d**; left, dmM,  $P = 0.0006$ ,  $F(4,32) = 6.52$ ; right, dmM to DR/MRN,  $P = 4.5e-3$ ,  $F(4,32) = 4.66$ , one-way repeated-measures ANOVA). The mean delay time was lowest when the onset of laser stimulation shortly followed the peak in the sigma power cycle during its falling phase (0 to  $\pi/2$  rad.). Interestingly, this optimal phase range also coincided with the phase values where the NREMs activity of the dmM neurons peaked preceding a transition to REMs (**Fig. 4f**). In contrast, the delay was longest when the laser onset fell on the trough ( $-\pi$  or  $\pi$  rad.).

The finding that the delay time depends on the phase suggests that the oscillation in sigma power indeed modulates the timing of the induction of REMs. In contrast to the delay, the probability of REMs induction was only weakly modulated for dmM GAD2 neuron stimulation and not significantly altered for the DR/MRN-projecting neurons (dmM, one-way repeated-measures ANOVA,  $P = 0.049$ ,  $F(4,20) = 2.88$ ; dmM to DR/MRN,  $P = 0.68$ ,  $F(4,20) = 0.581$ ) (**Fig. 5e**), likely because the 2 min laser stimulation interval offered sufficient opportunity for the laser to eventually overlap with the optimal sigma power range. Hence, while optogenetic activation of dmM neurons strongly increases the probability that REMs occurs during the 2 min laser stimulation interval (**Fig. 1d**, **Fig. 3e**), the infraslow oscillation contributes to determining when the REMs episode is initiated. The falling phase of the sigma power thus establishes an optimal time window during which activation of the dmM GAD2 neurons triggers REMs with minimal latency.

## DISCUSSION

Using optogenetic manipulation, we found that GAD2 neurons in the dmM promote the initiation of REMs and maintain both REMs and wakefulness (**Figs. 1, 2**). Viral anterograde tracing showed that the dmM neurons strongly project to the DRN and MRN. Using an AAV variant with high retrograde efficiency, we specifically expressed ChR2-eYFP in the subpopulation of dmM neurons projecting to the DR/MRN (**Fig. 3**), which were mainly located within the PH, next to the 4th ventricle. Optogenetic activation of the DR/MRN-projecting PH neurons enhanced both the initiation and maintenance of REMs without maintaining wakefulness, suggesting that they selectively promote REMs. Using fiber photometry, we showed that dmM GAD2 neurons are highly active during REMs, consistent with their role in promoting REMs (**Fig. 4**). Interestingly, during NREMs the activity of these neurons oscillates in close synchrony with the EEG sigma power. Optogenetic activation of dmM neurons was most effective in triggering REMs with minimal delay when the laser onset coincided with the falling phase of the sigma power oscillation (**Fig. 5**), demonstrating that this infraslow oscillation may play an important role in timing REMs episodes.



## **GABAergic medulla neurons promote REMs through inhibition of REMs-off neurons in pons and midbrain.**

Similar to the dmM, GAD2 neurons in the ventral medulla (vM) have also been shown to strongly promote REMs (Weber et al., 2015). The vM REMs-promoting neurons innervate vIPAG GABAergic neurons (Weber et al., 2015) and in contrast to the dmM neurons project less strongly to the raphe nuclei (Gervasoni et al., 2000). Comparable to the effects observed for chemo- or optogenetic excitation of GABAergic neurons in the vIPAG (Hayashi et al., 2015; Weber et al., 2018), a recent study showed that tonic optogenetic activation of serotonergic neurons in the DRN also suppresses REMs, while maintaining NREMs (Oikonomou et al., 2019). Fiber photometry imaging, consistent with previous electrophysiological recordings (McGinty and Harper, 1976), demonstrated that their activity is lowest during REMs. Hence, inhibitory neurons in the dmM and vM may constitute two complementary circuit nodes that act in concert to initiate and maintain REMs by suppressing REMs-off neurons throughout the midbrain and pons, including neurons in DRN, MRN, and vIPAG. In addition to these areas, the LC also receives strong axonal projections from inhibitory neurons in PH and DPGi (Ennis and Aston-Jones, 1989; Verret et al., 2006). Pharmacological inhibition of the LC suppressed the increase of REMs episode durations elicited by electrical stimulation of the PH, suggesting that this projection contributes to REMs maintenance (Kaur et al., 1997, 2001). As previous studies also demonstrated the importance of the DPGi in regulating REMs (Clément et al., 2014; Goutagny et al., 2008; Verret et al., 2006), it would be interesting to similarly test the specific role of DPGi inhibitory neurons using projection targets preferentially innervated by these neurons. Furthermore, identification of specific cell markers differentiating PH from DPGi neurons would allow for more targeted approaches in delineating the connectivity and function of these adjacent medulla nuclei in REMs control (Girard et al., 2020; Gutierrez Herrera et al., 2019).

Stimulation of dmM GAD2 neurons strongly promoted theta oscillations during NREMs indicating that these neurons directly or indirectly interact with circuits involved in generating hippocampal theta oscillations. Pharmacological inhibition (Kinney et al., 1994, 1995; Vertes et al., 1994) and lesions of the MRN (Maru et al., 1979) elicit theta oscillations. This effect is likely mediated by serotonergic neurons, as pharmacological stimulation of serotonergic autoreceptors in the MRN, which inactivates serotonergic neurons, triggers theta oscillations (Vertes et al., 1994). Postsynaptic inhibition of the median raphe by the dmM may therefore contribute to the induction of theta oscillations before and during REMs and underlie the increased EEG theta power during NREMs when stimulating dmM neurons.

In addition to circuits directly regulating REMs, the medulla contains further neural populations that are involved in generating defining properties of REMs. Glycinergic neurons in the ventromedial medulla have been shown to be crucial for the

characteristic paralysis of skeletal muscles during REMs (Chase et al., 1989; Holstege, 1991; Schenkel and Siegel, 1989; Valencia Garcia et al., 2018) and calbindin-expressing neurons within the DPGi are necessary for the occurrence of eye movements during REMs (Gutierrez Herrera et al., 2019). The medulla thus harbors a critical hub of circuits for the control of REMs and its defining electrophysiological and behavioral features.

### **Neural correlates of the infraslow oscillation.**

Using fiber photometry imaging, we found that the activity of dmM neurons is strongly modulated by the infraslow oscillation in sigma power. A previous study showed that this infraslow oscillation modulates the arousability of mice during NREMs. When presented with acoustic stimuli during NREMs, mice tended to sleep through when the stimulus coincided with the rising phase, but to wake up during the falling phase (Lecci et al., 2017). Relatedly, we found that optogenetic activation of the REMs-promoting dmM neurons was most efficient in triggering REMs with minimal delay, when the laser stimulation started during the falling phase of the sigma power oscillation. Thus, the falling phase marks a fragility window during which brain state transitions from both NREMs to wakefulness and NREMs to REMs are most likely to be initiated. The infraslow oscillation may directly contribute to the timing of NREMs to REMs transitions by modulating the activity of REMs regulatory neurons, as we showed for the dmM neurons, providing a link between spontaneous brain activity fluctuations on the infraslow timescale and brain state transitions.

The neural correlates underlying the infraslow oscillation are still largely unknown. This oscillation is present in the EEG/LFP of all cortical areas tested so far (Lecci et al., 2017). Consistent with the fact that sleep spindles are a major contributor to the sigma power (Fernandez et al., 2018), multi-unit activity in the thalamus, which is critical for spindle generation, is modulated on the infraslow timescale (Csernai et al., 2019). Similar to the dmM GAD2 neurons, the calcium activity during NREMs in apical dendrites of cortical layer 5 neurons is also tightly correlated with sigma power oscillations (Seibt et al., 2017). This suggests that this oscillation is a global rhythm shaping the spontaneous activity across multiple brain areas. Besides neural activity, the intrinsic blood oxygen level dependent (BOLD) signals in humans and the body temperature also exhibit modulations on the infraslow timescale (Csernai et al., 2019; Mitra et al., 2015) and autonomic variables such as heart rate and pupil diameter are closely correlated with the oscillations in the sigma range (Lecci et al., 2017; Yüzgeç et al., 2018). It would be therefore interesting for future studies to test whether the dmM neurons interact with output circuits of the sympathetic or parasympathetic system to coordinate infraslow modulations in autonomic activity with global brain state switches.

## METHODS

**Animals.** All experimental procedures were approved by the Institutional Animal Care and Use Committee (IACUC) at the University of Pennsylvania and conducted in accordance with the National Institutes of Health Office of Laboratory Animal Welfare Policy. Experiments were performed in male or female GAD2-IRES-Cre mice (Jackson Laboratory stock no. 010802). Animals were housed on a 12-h dark/12-h light cycle (lights on between 7 am and 7 pm) and were aged 6-12 weeks at the time of surgery. Male and female mice were distributed equally across groups in each experiment. All mice were group-housed with ad libitum access to food and water.

**Surgical Procedures.** All surgeries were performed following the IACUC guidelines for rodent survival surgery. Prior to surgery, mice were given meloxicam subcutaneously (5 mg/kg). Mice were anesthetized using isoflurane (1 - 4%) and positioned in a stereotaxic frame. Animals were placed on a heating pad to maintain the body temperature throughout the procedure. Following asepsis, the skin was incised to gain access to the skull. For virus injection or implantation, a small burr hole was drilled above the dorsomedial medulla (anteroposterior (AP) -6.4 to -6.7 mm, mediolateral (ML) 0 mm, dorsoventral (DV) -3.6 mm). For optogenetic activation of dmM GABAergic neurons, 0.1 to 0.3  $\mu$ l of AAV1-EF1a-DIO-hChR2-eYFP-WPRE-hGH (University of Pennsylvania vector core) was injected into the target area of GAD2-Cre mice using Nanoject II (Drummond Scientific) via a glass micropipette. For controls, we injected 0.1 to 0.3  $\mu$ l of AAV2-Ef1a-DIO-EYFP (University of Pennsylvania vector core) into the same area. To optogenetically stimulate dmM GABAergic neurons projecting to the DR/MRN, an additional burr hole was drilled (AP -4.8 mm, ML 0.0 to -0.25 mm, DV -3.2 to -3.4 mm) and 0.1 to 0.25  $\mu$ l of AAVrg-EF1a-DIO-hChR2-eYFP-WPRE-HGHpA (Addgene) were injected into the DR/MRN. After virus injection, an optical fiber (0.2 mm diameter) was inserted into the dmM (DV -3.4 to -3.5 mm). For fiber photometry experiments 0.1 to 0.3  $\mu$ l of AAV1-Syn-Flex- GCaMP6s-WPRE-SV40 (University of Pennsylvania vector core) was injected into dmM and the optic fiber (0.4 mm diameter) was placed on top of the injection site (DV -3.3 to -3.5 mm). EEG signals were recorded using stainless steel wires attached to two screws, one on top of the left hippocampus and one on top of the right prefrontal cortex. The reference screw was inserted on top of the left cerebellum. For EMG recordings, two stainless steel wires were inserted into the neck muscles. All electrodes, screws, connectors, and optic fibers were secured to the skull using dental cement. After injection and implantation were finished, bupivacaine (2 mg/kg) was administered at the incision site.

For fiber photometry and optogenetic experiments, we excluded animals where no virus expression could be detected or where the virus expression extended below the dmM, as were mice in which the optic fiber tip was located below the virus expression.

**Histology.** Mice were deeply anesthetized and transcardially perfused with 0.1 M phosphate-buffered saline (PBS) followed by 4% paraformaldehyde in PBS. After removal, brains remained overnight in fixative and were then stored in 30% sucrose by volume in PBS solution for at least one night. After embedding and freezing, brains were sliced into 30 or 40  $\mu\text{m}$  sections using a cryostat (Thermo Scientific HM525 NX) and mounted onto glass slides.

For immunohistochemistry, brain sections were washed in PBS, permeabilized using PBST (0.3% Triton X-100 in PBS) for 30 minutes and then incubated in blocking solution (5% normal goat serum or normal donkey serum in PBST) for 1 hour. To stain eYFP-expressing axon fibers, brain sections were subsequently incubated with a chicken anti-GFP primary antibody (Aves Lab, GFP8794984, 1:1,000) diluted in PBS for one night at 4°C. The next day, brain sections were incubated for 2 hours with a species-specific secondary antibody conjugated with green Alexa fluorophore (Jackson ImmunoResearch Laboratories, Inc., 703-545-155, 1:500; donkey anti-chicken) diluted in PBS. The slices were washed with PBS followed by counterstaining with Hoechst solution (33342, Thermo Scientific) and coverslipped with Fluoromount-G (Southern Biotech). Fluorescence images were taken using a fluorescence microscope (Microscope, Leica DM6B; Camera, Leica DFC7000GT; LED, Leica CTR6 LED).

**Fitting Histology to Reference Images.** To generate heatmaps of virus expression across mice (**Figs. 1,3**), coronal reference images were downloaded from Allen Mouse Brain Atlas for the appropriate A/P coordinates (© 2015 Allen Institute for Brain Science. Allen Brain Atlas API. Available from: <http://brain-map.org/api/index.html>). For a given AP reference section, the corresponding histology section from each mouse was overlaid and fitted to the reference. Regions in which visible cell bodies could be detected were then outlined by hand. Custom Python programs then detected these outlines and determined for each location on the reference picture the number of mice with overlapping virus expression, which was encoded using different green color intensities.

**Polysomnographic Recordings.** Sleep recordings were performed in the animal's home cage or in a cage each mouse was habituated to for 3 days, placed within a sound-attenuating box. For optogenetic studies, EEG and EMG signals were recorded using an RHD2000 amplifier (intan, sampling rate 1 kHz). For fiber photometry, we used a TDT RZ4P amplifier (sampling rate 1.5 kHz). EEG and EMG signals were referenced

to a common ground screw, placed on top of the cerebellum. During the recordings, EEG and EMG electrodes were connected to flexible recording cables using a small connector. To determine the brain state of the animal, we first computed the EEG and EMG spectrogram with consecutive fast fourier transforms (FFTs) calculated for sliding, half-overlapping 5s windows, resulting in 2.5 s time resolution. Next, we computed the time-dependent delta, theta, sigma and high gamma power by integrating frequencies in the range 0.5 to 4 Hz, 5 to 12 Hz, 12 to 20 Hz, and 100 to 150 Hz respectively. We also calculated the ratio of the theta and delta power (theta/delta) and the EMG power in the range 50 to 500 Hz. For each power band, we used its temporal mean to separate it into a low and high part (except for the EMG and theta/delta ratio, where we used the mean plus one standard deviation as threshold). REMs was defined by high theta/delta ratio, low EMG and low delta power. A state was set as NREMs, if delta power was high, the theta/delta ratio was low and EMG power was low. In addition, states with low EMG power, low delta, but high sigma power were scored as NREMs. Wake encompassed states with low delta power and high EMG power and each state with high gamma power (if not otherwise classified as REM). Finally, we manually verified the automatic classification using a graphical user interface, visualizing the raw EEG, EMG signals, spectrograms and hypnogram. The software for automatic brain state classification and manual inspection was programmed in Python.

**Optogenetic Manipulation.** We performed optogenetic experiments 3 to 6 weeks after surgery. Animals were habituated for at least two days to the recording setup. After habituation, sleep recordings for optogenetics were performed during the light cycle (between 8 am and 6 pm) and lasted 6.5 hours on average. For optogenetic experiments, mice were tethered to an optic fiber patch cable in addition to the cable used for EEG/EMG recordings. For optogenetic open-loop stimulation, we repeatedly presented 10 Hz pulse trains (10 ms up, 90 ms down) lasting for 120 s generated by a blue 473 nm laser (4 - 6 mW, including closed-loop stimulation; Laserglow). The inter-stimulation interval was randomly chosen from a uniform distribution ranging from 10 to 20 min. TTL pulses to trigger the laser were controlled using a raspberry pi, which in turn was controlled by a custom-programmed user interface programmed in Python. For optogenetic closed-loop stimulation, the program determined whether the animal was in REMs or not based on real-time spectral analysis of the EEG and EMG signals. The onset of REMs was defined as the time point where the EEG theta/delta ratio exceeded a hard threshold (mean + std of theta/delta), which was calculated using previous recordings from the same animal. REMs lasted until the theta/delta ratio dropped below a soft threshold (mean of theta/delta) or if the EMG amplitude passed an offline calculated threshold. When REMs was detected, the laser turned on with 50% probability and turned off when the REMs episode ended. Optogenetic sleep recordings



which contained significant EEG or EMG artifacts were excluded. For EEG power spectral density analysis (**Fig. 3g**) and EMG amplitude analysis (**Supplementary Fig. 3d**) we excluded one recording due to artifacts in the EEG or EMG signal, respectively. These recordings were still included in the remaining analyses, because the artifacts did not affect sleep state scoring.

**Fiber Photometry.** Calcium imaging using fiber photometry was performed in mice freely moving in their home cages, placed within a sound-attenuated chamber. The implanted optic fiber was connected to a flexible patch cable. In addition, a flexible cable was connected to the EEG/EMG electrodes via a mini-connector. For calcium imaging, a first LED (Doric Lenses) generated the excitation wavelength of 465 nm, while a second LED emitted 405 nm light, which served as control for bleaching and motion artifacts, as the emission signal from the 405 nm illumination is independent of the intracellular calcium concentration. The 465 and 405 nm signals were modulated at two different frequencies (210 and 330 Hz). Both lights were passed through dichroic mirrors before entering a patch cable attached to the optic fiber. Fluorescence signals emitted by GCaMP6s were collected by the optic fiber and passed via the patch cable through a dichroic mirror and GFP emission filter (Doric Lenses) before entering a photoreceiver (Newport Co.). Photoreceiver signals were relayed to an RZ5P amplifier (TDT) and demodulated into two signals using TDT's Synapse software, corresponding to the 465 and 405 nm excitation wavelengths. For further analysis, we used custom-written Python scripts. First, both signals were low-pass filtered at 2 Hz using a 4th order digital Butterworth filter. Next, using linear regression, we fitted the 405 nm to the 465 nm signal. Finally, the linear fit was subtracted from the 465 nm signal (to correct for photo-bleaching or motion artifacts) and the difference was divided by the linear fit yielding the  $\Delta F/F$  signal. To determine the brain state, EEG and EMG signals were recorded together with fluorescence signals using the RZ5P amplifier. All recordings were performed during the light phase between 8am and 4pm and lasted for 2 hours. We excluded fiber photometry recordings which contained sudden shifts in the baseline (likely due to a loose connection between optic fiber and patch cord), or with only one or no REMs episodes (as we could not perform inter-REM interval analyses with these recordings).

**Infraslow calculation.** To calculate the spectral density of the EEG sigma power (**Fig. 5b, Suppl. Fig. 4d**), we first calculated for each recording the EEG power spectrogram by computing the FFT for consecutive sliding, half-overlapping 5 s windows. Next, we normalized the spectrogram by dividing each frequency component by its mean power and calculated the relative sigma power by averaging across the spectral density values

in the sigma range (10 to 15 Hz). As the infraslow rhythm is most pronounced in consolidated NREMs bouts (Lecci et al., 2017), we only considered NREMs bouts that lasted at least 120 s and were only interrupted by microarousals (wake periods  $\leq 10$ s). We then calculated the power spectral density using Welch's method (with Hann window) for each consolidated NREMs bout and then averaged for each animal across the resulting densities.

To determine the instantaneous phase of the infraslow rhythm, we smoothed the sigma power using a 10 s box filter and band-pass filtered it in the range 0.01 - 0.03 Hz using a 4th order digital Butterworth filter. Finally, we computed the phase angle by applying the Hilbert transform to the band-pass filtered sigma power signal (**Figs. 4b, 5c**). Based on the phase, we could then isolate the beginning and end of single infraslow periods to average the  $\Delta F/F$  activity of dmM neurons during single cycles (**Fig. 4e**) or to determine the phase at the onset of laser stimulation in the optogenetic open-loop experiments (**Fig. 5**). To calculate the  $\Delta F/F$  activity during single infraslow oscillation cycles, we first downsampled calcium signals to the same temporal resolution (2.5 s) as the sigma power, and then normalized the duration of cycles for averaging.

To calculate the cross-correlation between  $\Delta F/F$  signals and sigma power (or other power bands), we first calculated for all NREMs bouts equal or larger than 120 s (possibly interrupted by microarousals) the sigma power (**s**) from the EEG spectrogram, computed using consecutive 2.5s windows, with 80% overlap to increase the temporal resolution. We again normalized the spectrogram by dividing each frequency component by its mean power. Using the same overlapping binning we downsampled the  $\Delta F/F$  signal (**d**) to prevent any time lags resulting from differences in downsampling and then calculated the cross-correlation of both signals. The cross-correlation was normalized by dividing it by the product of the standard deviation of **s** and **d** and the number of data points in **s** and **d**. For each mouse we finally obtained the mean cross-correlation by averaging across all NREMs bouts.

**Statistics.** Statistical analyses were performed using the python modules `scipy.stats` (`scipy.org`) and `pingouin` (`https://pingouin-stats.org`). We did not predetermine sample sizes, but cohorts were similarly sized as in other relevant sleep studies (Eban-Rothschild et al., 2016; Yu et al., 2019). All statistical tests were two-sided. The significance of changes in brain state percentages or transition probabilities between brain states induced by laser stimulation were tested using bootstrapping. Otherwise, data were compared using one-way or two-way ANOVA followed by multiple comparisons tests or t-tests. We verified that the data were normally distributed using the Shapiro-Wilk test for normality. For percentages and probabilities we computed 95% confidence intervals using bootstrapping and visualized them using custom-written

functions or seaborn (<https://seaborn.pydata.org>). Otherwise, results in figures were represented as mean  $\pm$  s.e.m.



## REFERENCES

- Adamantidis, A.R., Gutierrez Herrera, C., and Gent, T.C. (2019). Oscillating circuitries in the sleeping brain. *Nat. Rev. Neurosci.* *20*, 746–762.
- Barbato, G., and Wehr, T.A. (1998). Homeostatic Regulation of REM Sleep in Humans During Extended Sleep. *Sleep* *21*, 267–276.
- Benington, J.H., and Heller, H.C. (1994). REM-sleep timing is controlled homeostatically by accumulation of REM-sleep propensity in non-REM sleep. *Am. J. Physiol.-Regul. Integr. Comp. Physiol.* *266*, R1992–R2000.
- Chase, M.H., Soja, P.J., and Morales, F.R. (1989). Evidence that glycine mediates the postsynaptic potentials that inhibit lumbar motoneurons during the atonia of active sleep. *J. Neurosci. Off. J. Soc. Neurosci.* *9*, 743–751.
- Clément, O., Sapin, E., Libourel, P.-A., Arthaud, S., Brischoux, F., Fort, P., and Luppi, P.-H. (2012). The Lateral Hypothalamic Area Controls Paradoxical (REM) Sleep by Means of Descending Projections to Brainstem GABAergic Neurons. *J. Neurosci.* *32*, 16763–16774.
- Clément, O., Garcia, S.V., Libourel, P.-A., Arthaud, S., Fort, P., and Luppi, P.-H. (2014). The Inhibition of the Dorsal Paragigantocellular Reticular Nucleus Induces Waking and the Activation of All Adrenergic and Noradrenergic Neurons: A Combined Pharmacological and Functional Neuroanatomical Study. *PLOS ONE* *9*, e96851.
- Csernai, M., Borbély, S., Kocsis, K., Burka, D., Fekete, Z., Balogh, V., Káli, S., Emri, Z., and Barthó, P. (2019). Dynamics of sleep oscillations is coupled to brain temperature on multiple scales. *J. Physiol.* *597*, 4069–4086.
- Eban-Rothschild, A., Rothschild, G., Giardino, W.J., Jones, J.R., and Lecea, L. de (2016). VTA dopaminergic neurons regulate ethologically relevant sleep–wake behaviors. *Nat. Neurosci.* *19*, 1356.
- Ennis, M., and Aston-Jones, G. (1989). Potent inhibitory input to locus coeruleus from the nucleus prepositus hypoglossi. *Brain Res. Bull.* *22*, 793–803.
- Fernandez, L.M.J., and Lüthi, A. (2019). Sleep Spindles: Mechanisms and Functions. *Physiol. Rev.* *100*, 805–868.
- Fernandez, L.M., Vantomme, G., Osorio-Forero, A., Cardis, R., Béard, E., and Lüthi, A. (2018). Thalamic reticular control of local sleep in mouse sensory cortex. *ELife* *7*, e39111.
- Gervasoni, D., Peyron, C., Rampon, C., Barbagli, B., Chouvet, G., Urbain, N., Fort, P., and Luppi, P.-H. (2000). Role and Origin of the GABAergic Innervation of Dorsal Raphe Serotonergic Neurons. *J. Neurosci.* *20*, 4217–4225.
- Girard, F., von Siebenthal, M., Davis, F.P., and Celio, M.R. (2020). Gene expression analysis in the mouse brainstem identifies Cart and Nesfatin as neuropeptides coexpressed in the Calbindin-positive neurons of the Nucleus papilio. *Sleep* *43*.
- Gottesmann, C. (1996). The Transition from Slow-wave Sleep to Paradoxical Sleep:

Evolving Facts and Concepts of the Neurophysiological Processes Underlying the Intermediate Stage of Sleep. *Neurosci. Biobehav. Rev.* *20*, 367–387.

Goutagny, R., Luppi, P.-H., Salvert, D., Lapray, D., Gervasoni, D., and Fort, P. (2008). Role of the dorsal paragigantocellular reticular nucleus in paradoxical (rapid eye movement) sleep generation: a combined electrophysiological and anatomical study in the rat. *Neuroscience* *152*, 849–857.

Gutierrez Herrera, C., Girard, F., Bilella, A., Gent, T.C., Roccaro-Waldmeyer, D.M., Adamantidis, A., and Celio, M.R. (2019). Neurons in the Nucleus papilio contribute to the control of eye movements during REM sleep. *Nat. Commun.* *10*, 1–11.

Hayashi, Y., Kashiwagi, M., Yasuda, K., Ando, R., Kanuka, M., Sakai, K., and Itohara, S. (2015). Cells of a common developmental origin regulate REM/non-REM sleep and wakefulness in mice. *Science* *350*, 957–961.

Holstege, G. (1991). Chapter 14 Descending motor pathways and the spinal motor system: Limbic and non-limbic components. In *Progress in Brain Research*, G. Holstege, ed. (Elsevier), pp. 307–421.

Kaur, S., Saxena, R., and Mallick, B.N. (1997). GABA in locus coeruleus regulates spontaneous rapid eye movement sleep by acting on GABA<sub>A</sub> receptors in freely moving rats. *Neurosci. Lett.* *223*, 105–108.

Kaur, S., Saxena, R., and Mallick, B.N. (2001). GABAergic neurons in prepositus hypoglossi regulate REM sleep by its action on locus coeruleus in freely moving rats. *Synapse* *42*, 141–150.

Kaur, S., Thankachan, S., Begum, S., Liu, M., Blanco-Centurion, C., and Shiromani, P.J. (2009). Hypocretin-2 Saporin Lesions of the Ventrolateral Periaqueductal Gray (vlPAG) Increase REM Sleep in Hypocretin Knockout Mice. *PLOS ONE* *4*, e6346.

Kinney, G.G., Kocsis, B., and Vertes, R.P. (1994). Injections of excitatory amino acid antagonists into the median raphe nucleus produce hippocampal theta rhythm in the urethane-anesthetized rat. *Brain Res.* *654*, 96–104.

Kinney, G.G., Kocsis, B., and Vertes, R.P. (1995). Injections of muscimol into the median raphe nucleus produce hippocampal theta rhythm in the urethane anesthetized rat. *Psychopharmacology (Berl.)* *120*, 244–248.

Le Bon, O. (2020). Relationships between REM and NREM in the NREM-REM sleep cycle: a review on competing concepts. *Sleep Med.* *70*, 6–16.

Lecci, S., Fernandez, L.M.J., Weber, F.D., Cardis, R., Chatton, J.-Y., Born, J., and Lüthi, A. (2017). Coordinated infraslow neural and cardiac oscillations mark fragility and offline periods in mammalian sleep. *Sci. Adv.* *3*.

Lerner, T.N., Shilyansky, C., Davidson, T.J., Evans, K.E., Beier, K.T., Zalocusky, K.A., Crow, A.K., Malenka, R.C., Luo, L., Tomer, R., et al. (2015). Intact-Brain Analyses Reveal Distinct Information Carried by SNc Dopamine Subcircuits. *Cell* *162*, 635–647.

Lu, J., Sherman, D., Devor, M., and Saper, C.B. (2006). A putative flip–flop switch for control of REM sleep. *Nature* *441*, 589–594.

Luppi, P.-H., Clement, O., Sapin, E., Peyron, C., Gervasoni, D., Léger, L., and Fort, P. (2012). Brainstem mechanisms of paradoxical (REM) sleep generation. *Pflüg. Arch. Eur. J. Physiol.* *463*, 43–52.

Maru, E., Takahashi, L.K., and Iwahara, S. (1979). Effects of median raphe nucleus lesions on hippocampal EEG in the freely moving rat. *Brain Res.* *163*, 223–234.

McGinty, D.J., and Harper, R.M. (1976). Dorsal raphe neurons: depression of firing during sleep in cats. *Brain Res.* *101*, 569–575.

Mitra, A., Snyder, A.Z., Tagliazucchi, E., Laufs, H., and Raichle, M.E. (2015). Propagated infra-slow intrinsic brain activity reorganizes across wake and slow wave sleep. *ELife* *4*, e10781.

Ocampo-Garcés, A., Molina, E., Rodríguez, A., and Vivaldi, E.A. (2000). Homeostasis of REM Sleep After Total and Selective Sleep Deprivation in the Rat. *J. Neurophysiol.* *84*, 2699–2702.

Ocampo-Garcés, A., Bassi, A., Brunetti, E., Estrada, J., and Vivaldi, E.A. (2020). REM sleep-dependent short-term and long-term hourglass processes in the ultradian organization and recovery of REM sleep in the rat. *Sleep* *43*.

Oikonomou, G., Altermatt, M., Zhang, R.-W., Coughlin, G.M., Montz, C., Gradinaru, V., and Prober, D.A. (2019). The Serotonergic Raphe Promote Sleep in Zebrafish and Mice. *Neuron* *103*, 686-701.e8.

Park, S.-H., and Weber, F. (2020). Neural and Homeostatic Regulation of REM Sleep. *Front. Psychol.* *11*.

Peever, J., and Fuller, P.M. (2017). The Biology of REM Sleep. *Curr. Biol.* *27*, R1237–R1248.

Sakai, K. (2018). Behavioural state-specific neurons in the mouse medulla involved in sleep-wake switching. *Eur. J. Neurosci.* *47*, 1482–1503.

Saper, C.B., Fuller, P.M., Pedersen, N.P., Lu, J., and Scammell, T.E. (2010). Sleep State Switching. *Neuron* *68*, 1023–1042.

Sapin, E., Lapray, D., Bérod, A., Goutagny, R., Léger, L., Ravassard, P., Clément, O., Hanriot, L., Fort, P., and Luppi, P.-H. (2009). Localization of the Brainstem GABAergic Neurons Controlling Paradoxical (REM) Sleep. *PLoS ONE* *4*, e4272.

Scammell, T.E., Arrigoni, E., and Lipton, J.O. (2017). Neural Circuitry of Wakefulness and Sleep. *Neuron* *93*, 747–765.

Schenkel, E., and Siegel, J. (1989). REM sleep without atonia after lesions of the medial medulla. *Neurosci. Lett.* *98*, 159–165.

Seibt, J., Richard, C.J., Sigl-Glöckner, J., Takahashi, N., Kaplan, D.I., Doron, G., Limoges, D. de, Bocklisch, C., and Larkum, M.E. (2017). Cortical dendritic activity correlates with spindle-rich oscillations during sleep in rodents. *Nat. Commun.* *8*, 684.

Tervo, D.G.R., Hwang, B.-Y., Viswanathan, S., Gaj, T., Lavzin, M., Ritola, K.D., Lindo,

S., Michael, S., Kuleshova, E., Ojala, D., et al. (2016). A Designer AAV Variant Permits Efficient Retrograde Access to Projection Neurons. *Neuron* 92, 372–382.

Terzano, M.G., Mancia, D., Salati, M.R., Costani, G., Decembrino, A., and Parrino, L. (1985). The Cyclic Alternating Pattern as a Physiologic Component of Normal NREM Sleep. *Sleep* 8, 137–145.

Ursin, R. (1970). Sleep stage relations within the sleep cycles of the cat. *Brain Res.* 20, 91–97.

Valencia Garcia, S., Brischoux, F., Clément, O., Libourel, P.-A., Arthaud, S., Lazarus, M., Luppi, P.-H., and Fort, P. (2018). Ventromedial medulla inhibitory neuron inactivation induces REM sleep without atonia and REM sleep behavior disorder. *Nat. Commun.* 9, 1–11.

Vanini, G., Torterolo, P., McGregor, R., Chase, M., and Morales, F. (2007). GABAergic processes in the mesencephalic tegmentum modulate the occurrence of active (rapid eye movement) sleep in guinea pigs. *Neuroscience* 145, 1157–1167.

Verret, L., Fort, P., Gervasoni, D., Léger, L., and Luppi, P.-H. (2006). Localization of the neurons active during paradoxical (REM) sleep and projecting to the locus coeruleus noradrenergic neurons in the rat. *J. Comp. Neurol.* 495, 573–586.

Vertes, R.P., Kinney, G.G., Kocsis, B., and Fortin, W.J. (1994). Pharmacological suppression of the median raphe nucleus with serotonin1a agonists, 8-OH-DPAT and buspirone, produces hippocampal theta rhythm in the rat. *Neuroscience* 60, 441–451.

Vivaldi, E.A., Ocampo, A., Wyneken, U., Roncagliolo, M., and Zapata, A.M. (1994). Short-term homeostasis of active sleep and the architecture of sleep in the rat. *J. Neurophysiol.* 72, 1745–1755.

Watson, B.O. (2018). Cognitive and Physiologic Impacts of the Infralow Oscillation. *Front. Syst. Neurosci.* 12.

Weber, F., Chung, S., Beier, K.T., Xu, M., Luo, L., and Dan, Y. (2015). Control of REM sleep by ventral medulla GABAergic neurons. *Nature* 526, 435–438.

Weber, F., Hoang Do, J.P., Chung, S., Beier, K.T., Bikov, M., Saffari Doost, M., and Dan, Y. (2018). Regulation of REM and Non-REM Sleep by Periaqueductal GABAergic Neurons. *Nat. Commun.* 9, 354.

Yu, X., Li, W., Ma, Y., Tossell, K., Harris, J.J., Harding, E.C., Ba, W., Miracca, G., Wang, D., Li, L., et al. (2019). GABA and glutamate neurons in the VTA regulate sleep and wakefulness. *Nat. Neurosci.* 22, 106–119.

Yüzgeç, Ö., Prsa, M., Zimmermann, R., and Huber, D. (2018). Pupil Size Coupling to Cortical States Protects the Stability of Deep Sleep via Parasympathetic Modulation. *Curr. Biol.* 28, 392-400.e3.

## FIGURE LEGENDS

### Figure 1. Optogenetic activation of dmM GAD2 neurons promotes REMs.

**(a)** Schematic of optogenetic experiment. Left, coronal diagram of mouse brain indicating injection site and optic fiber placement. Gray rectangle, optic fiber. Right, fluorescence image of dmM in a GAD2-Cre mouse injected with ChR2-eYFP (green). Blue, Hoechst stain. Scale bar, 1 mm. **(b)** Outline of areas with ChR2-eYFP expressing cell bodies along the rostrocaudal axis within three coronal brain sections. The green color code indicates in how many mice the virus expression overlapped at the corresponding location ( $n = 9$  mice). The coronal brain schemes were adapted from Allen Mouse Brain Atlas (© 2015 Allen Institute for Brain Science. Allen Brain Atlas API. Available from: <http://brain-map.org/api/index.html>). PH, nucleus prepositus hypoglossi; DPGi, dorsal paragigantocellular nucleus; mlf, medial longitudinal fasciculus; MV, medial vestibular nucleus; NTS, nucleus of the solitary tract; XII, hypoglossal nucleus. **(c)** Example experiment. Shown are EEG spectrogram, EMG amplitude, and color-coded brain states. The blue patches indicate 2 min laser stimulation intervals (473 nm, 10 Hz). Two EEG and EMG raw traces are shown at an expanded timescale for the selected time points (dashed lines; scale bars, 1 s and 0.5 mV). PSD, power spectral density. **(d)** Percentage of REMs, NREMs, and wake before, during, and after laser stimulation ( $n = 9$  mice). Laser stimulation significantly increased REMs ( $P < 0.001$ , bootstrap,  $n = 9$  mice), decreased NREMs ( $P < 0.001$ ) and caused a delayed increase in wake ( $P < 0.001$ ). Shadings, 95% confidence intervals (CIs). **(e)** Impact of laser stimulation on EEG spectrogram and different power bands. Top, laser trial averaged EEG spectrogram with logarithmic frequency axis. Each frequency component of the spectrogram was normalized by its mean power across the recording. Bottom, time course of delta (0.5-4.5 Hz), theta (6-9 Hz), sigma (10-15 Hz), and gamma power (55-90 Hz) before, during, and after laser stimulation. During laser stimulation theta ( $P = 0.007$ ,  $T = -3.60$ ; paired t-test,  $n = 9$  mice) and gamma power ( $P = 6.8e-5$ ,  $T = -7.52$ ) were increased, while delta ( $P = 3.5e-5$ ,  $T = -8.26$ ) and sigma power ( $P = 0.001$ ,  $T = -4.91$ ) were reduced. Shadings,  $\pm$  s.e.m. **(f)** Spectral density of EEG during REMs (top), wake (middle), and NREMs (bottom) with and without (w/o) laser stimulation. During NREMs, laser stimulation significantly reduced delta power (red line;  $P = 0.00025$ ,  $T = -6.22$ , paired t-test) and increased theta power (green line;  $P = 9.9e-4$ ,  $T = 5.04$ ). During wake, the delta power ( $P = 0.0001$ ,  $T = -6.88$ ) was reduced. \*\*/###,  $P < 0.01$ ; \*\*\*/####,  $P < 0.001$  for significant increases/decreases. **(g)** Effect of laser stimulation of dmM GAD2 neurons on brain state transition probabilities. Transition probabilities were calculated for 10 s bins. Each bar represents the average transition probability during a 30 s interval. Error bars represent the 95% CI. The red line and shading depict the average baseline transition probability (computed for the interval preceding laser stimulation) and the 95% CI, respectively. Laser stimulation significantly increased the probability of NREMs to REMs transitions (NREM  $\rightarrow$  REM,  $P < 0.001$ , bootstrap), REMs to REMs (REM  $\rightarrow$  REM,  $P < 0.001$ ) and wake to wake transitions (Wake  $\rightarrow$  Wake,  $P < 0.001$ ), while suppressing REMs to wake (REM  $\rightarrow$  Wake,  $P < 0.001$ ) and wake to NREMs transitions (Wake  $\rightarrow$  NREM,  $P < 0.001$ ). The arrow indicates a brief increase in NREMs to wake transitions directly following laser stimulation (NREM  $\rightarrow$



Wake,  $P < 0.001$ ). CIs and P-values were calculated using bootstrapping. **\*\*\*/###**,  $P < 0.001$  for significant increases/decreases.

## **Figure 2. Closed-loop optogenetic activation of dmM GAD2 neurons maintains REM sleep.**

**(a)** Schematic of closed-loop stimulation protocol. The brain state is continuously monitored; once a REMs episode is detected, laser stimulation is initiated and maintained throughout REMs. **(b)** Example experiment. Shown are EEG spectrogram, EMG amplitude, and color-coded brain states. The blue patches indicate laser stimulation intervals (473 nm, 10 Hz). The arrows indicate a preceding REMs episode ( $REM_{pre}$ ) and the subsequent inter-REM interval. PSD, power spectral density. **(c)** Duration of REMs episodes with and without laser. Closed-loop stimulation significantly increased the duration of REMs episodes ( $P = 0.0003$ ,  $T = 11.70$ , paired t-test,  $n = 5$  mice). **\*\*\***,  $P < 0.001$  for significant increase. Bars, mean duration; lines, individual mice. **(d)** Effects of laser stimulation on the total NREMs and wake duration during the inter-REM interval. REMs episodes with closed-loop stimulation were followed by a larger total duration of NREMs during the subsequent inter-REM interval (NREM,  $P = 0.009$ ,  $T = 4.71$ ; paired t-test,  $n = 5$  mice). The subsequent amount of wakefulness was not significantly changed (Wake,  $P = 0.35$ ,  $T = -1.06$ , paired t-test,  $n = 5$  mice). **\***,  $P < 0.05$ , paired t-test. Bars, mean duration; lines, individual mice.

## **Figure 3. DR/MRN-projecting dmM GAD2 neurons specifically promote REMs.**

**(a)** Left, schematic sagittal brain section depicting injection of AAV-DIO-ChR2 into the dmM of a GAD2-Cre mouse. Right, fluorescence image of injection site showing expression of ChR2-eYFP in the dmM (bottom) and image showing axonal projections of dmM GAD2 neurons in midbrain and pons (top). Axonal projections were strongest in the dorsal raphe (DRN) and median raphe nucleus (MRN). Blue, Hoechst stain. Scale bars, 1 mm. vIPAG, ventrolateral periaqueductal gray; Aq, aqueduct. **(b)** Schematic depicting injection of AAVrg-DIO-ChR2 into the DR/MRN area of a GAD2-Cre mouse and implantation of an optic fiber into the dmM for stimulation of retrogradely labeled neurons. Top, expression of ChR2-eYFP at the injection area. Bottom, retrogradely labeled neurons in the dmM. Red, Di-I labeling solution. Scale bars, 1 mm. **(c)** Expression of ChR2-eYFP in the dmM of GAD2-Cre mice injected with AAVrg-DIO-ChR2 into the DR/MRN. The green color code indicates in how many mice the virus expression overlapped at the corresponding location ( $n = 9$ ). **(d)** Example experiment. Shown are EEG spectrogram, EMG amplitude, and brain states. Two EEG, EMG raw traces during NREMs and REMs are represented on an expanded timescale for the selected time points (dashed lines; scale bars, 1 s and 0.5 mV). PSD, power spectral density. **(e)** Percentage of REMs, NREMs, and wake before, during, and after laser stimulation ( $n = 9$  mice). Shadings, 95% CIs. Laser stimulation significantly increased REMs ( $P < 0.001$ , bootstrap), decreased NREMs ( $P < 0.001$ ), and did not affect wake ( $P = 0.32$ ). **(f)** Impact of laser stimulation on EEG spectrogram and different power bands. Top, laser trial averaged EEG spectrogram with logarithmic frequency

axis. Each frequency of the spectrogram was normalized by its mean power across the recording. Bottom, delta (0.5-4.5 Hz), theta (6-9 Hz), sigma (10-15 Hz), and gamma (55-90 Hz) power before, during, and after laser stimulation. Laser stimulation significantly increased theta ( $P = 0.007$ ,  $T = 3.6$ , paired t-test,  $n = 9$  mice) and gamma power ( $P = 7.1e-4$ ,  $T = 5.32$ ), while reducing delta ( $P = 4.1e-5$ ,  $T = -8.06$ ) and sigma power ( $P = 0.004$ ,  $T = -3.92$ ). Shadings,  $\pm$  s.e.m. **(g)** Power spectral density of EEG during REMs (top), wake (middle), and NREMs (bottom) with and without laser stimulation. During NREMs optogenetic activation significantly reduced delta ( $P = 0.0012$ ,  $T = -5.19$ ; paired t-test,  $n = 9$  mice) and increased theta power ( $P = 0.0027$ ,  $T = 4.27$ ). During wake, delta, theta, and sigma power were significantly decreased (delta,  $P = 8.3e-4$ ,  $T =$ , theta,  $P = 0.0018$ ,  $T = -4.56$ , sigma,  $P = 0.0058$ ,  $T = -3.73$ ; paired t-test). **\*\*\*/####**,  $P < 0.001$ ; **\*\*/###**,  $P < 0.01$  for significant increases/decreases. **(h)** Effect of laser stimulation of DR/MRN-projecting neurons on brain state transition probabilities. Transition probabilities were calculated for 10 s bins. Each bar represents the average transition probability during a 30 s interval. Error bars represent the 95% CI. The red line and shading depict the average baseline transition probability (computed for the interval preceding laser stimulation) and the 95% CI, respectively. Laser stimulation significantly increased the probability of NREMs to REMs transitions (NREM  $\rightarrow$  REM,  $P < 0.001$ , bootstrap), REMs to REMs (REM  $\rightarrow$  REM,  $P < 0.001$ ), while suppressing REMs to wake transitions (REM  $\rightarrow$  Wake,  $P < 0.001$ ). The probability of wake to wake (Wake  $\rightarrow$  Wake,  $P = 0.21$ ) and wake to NREMs transitions (Wake  $\rightarrow$  NREM,  $P = 0.16$ ) was not significantly altered. The arrow indicates a brief increase in NREMs to wake transitions following laser stimulation ( $P < 0.001$ ). **\*\*\*/####**,  $P < 0.001$  for significant increases/decreases.

#### **Figure 4. dmM neurons are most active during REMs and their NREMs activity is synchronized with the EEG sigma power.**

**(a)** Top, Schematic of calcium imaging using fiber photometry. AAVs expressing GCaMP6s were injected into the dmM of GAD2-cre mice. Gray rectangle, optic fiber. Bottom, fluorescence image showing expression of GCaMP6s (green) in the dmM. Blue, Hoechst stain. Scale bar, 1mm. **(b)** Top, example fiber photometry recording. Shown are EEG spectrogram, EMG amplitude, color-coded brain states, and  $\Delta F/F$  signal. PSD, power spectral density. Bottom left, the black box indicates an interval for which the EEG sigma power (top) and calcium signal (bottom) are shown at an expanded timescale. The filtered sigma power (dashed line) was used to determine the phase of the sigma power oscillation (middle). Bottom right, cross-correlation between the calcium signal and sigma power during NREMs for the entire example recording. **(c)** Average  $\Delta F/F$  activity during REMs, wake, and NREMs. Each line shows the activity of one mouse ( $n = 6$  mice). In each mouse, the brain state significantly modulated the activity ( $P < 0.05$ , one-way ANOVA), and in 5 out of 6 animals the calcium activity was highest during REMs ( $P < 0.05$ , Tukey post-hoc test). **(d)** Cross-correlation between calcium activity and EEG delta, theta, or sigma power during NREMs. The correlation was strongest for the sigma power (one-way repeated-measures ANOVA,  $P = 1.41e-07$ ,  $F(2, 10) = 151.47$ ; Bonferroni correction,  $P < 0.0001$ ). The cross correlation of the two

signals was maximal at  $0.75 \text{ s} \pm 0.32 \text{ s}$  (mean  $\pm$  s.d.) Shadings,  $\pm$  s.e.m. The dotted line indicates time point 0. **(e)** Average sigma power and calcium activity during a single cycle of the sigma power oscillation. Each sigma power cycle was normalized in time, thus ranging from  $-\pi$  to  $\pi$  rad. The phase of the sigma power significantly modulated the calcium activity (one-way repeated measures ANOVA,  $P = 2.89\text{e-}46$ ,  $F(20, 100) = 58.90$ ; one-way repeated measures ANOVA). Shadings,  $\pm$  s.e.m. **(f)** Calcium activity during single sigma power cycles for NREMs to REMs and NREMs to wake transitions. The duration of the REM or wake interval was normalized in time. The activity during NREMs was significantly different depending on whether the mouse transitioned to REMs or wake ( $F(20,100) = 4.017$ ,  $P = 0.045$ , one-way repeated-measures ANOVA). Wake also includes microarousals (wake periods  $\leq 10\text{s}$ ). Shown are averages across mice ( $n = 6$ ). Shadings,  $\pm$  s.e.m.

**Figure 5. Optogenetic laser stimulation elicits REMs transitions at minimal delay during the falling phase of the sigma power oscillation.**

**(a)** Distribution of delay times between onset of laser stimulation and REMs episodes for open-loop stimulation of dmM GAD2 and DR/MRN-projecting neurons (**Figs. 1,3**;  $n = 9$  mice for both data sets). Red, dmM; blue, dmM to DR/MRN. **(b)** Spectral densities of the EEG sigma power for open-loop stimulation of dmM GAD2 and DR/MRN-projecting neurons during consolidated NREMs. The spectral densities peaked for both data sets in the infraslow range (dmM,  $0.021 \pm 0.0064$  Hz, dmM to DR/MRN,  $0.015 \pm 0.0029$  Hz, mean,  $0.018 \text{ Hz} \pm 0.0057$ ; mean  $\pm$  s.d.), indicating a dominant infraslow oscillation in sigma power with an average wavelength of 55.6 s. Red, dmM; blue, dmM to DR/MRN; teal, average across all mice from both data sets. Red, blue shadings,  $\pm$  s.e.m. **(c)** Example of a laser trial. Shown are the EEG spectrogram, color coded brain states and sigma power. Filtered sigma power (dashed line) was used to determine the phase of the sigma power oscillation at the laser onset. For each laser trial preceded by at least 2 min of NREMs (only interrupted by microarousals), we determined the delay between laser and REMs onset. **(d)** Delay times between laser and REMs onset depending on the phase of the sigma power oscillation at laser onset. Left, delay times for stimulation of GAD2 dmM neurons. Phase values were divided into five equally sized bins. For all laser trials within a given bin, we calculated the average delay time between laser and REMs onset across mice. The delay times were significantly modulated by the phase ( $P = 5.9\text{e-}4$ ,  $F = 6.52$ , one way repeated-measures ANOVA; minimal delay,  $30.7 \text{ s} \pm 13.0 \text{ s}$ , mean  $\pm$  sd). \*\*\*,  $P < 0.001$ . Shading,  $\pm$  s.e.m. Right, delay times for stimulation of the DR/MRN-projecting neurons. The delay times were significantly modulated by the phase ( $P = 4.5\text{e-}3$ ,  $F(4,32) = 4.66$ , one way repeated-measures ANOVA; minimal delay,  $31.7 \text{ s} \pm 14.9 \text{ s}$ , mean  $\pm$  sd). \*\*,  $P < 0.01$ . Shading,  $\pm$  s.e.m. **(e)** Probability of REMs induction during the 120 s stimulation interval in dependence of the sigma power phase. For each mouse and phase bin, we divided the number of successful trials (where REMs was triggered) by the number of non-successful trials. In contrast to the delay times, the probability of REMs induction was only weakly modulated (dmM, GAD2,  $P = 0.049$ ,  $F(4,28) = 2.88$ ; DR/MRN-projecting neurons,  $P = 0.68$ ,  $F(4,28) = 0.581$ , one-way repeated measures ANOVA) \*\*,  $P < 0.01$ ; \*\*\*,  $P < 0.001$ . Shading, 95% CI.



## **Acknowledgements**

This work was supported by the National Institute of Health (NIH)/National Heart, Lung, and Blood Institute (NHLBI), R01HL149133 to FW, a NARSAD Young Investigator grant (#27799) to FW by the Brain & Behavior Research Foundation, and by a grant from the Margaret Q. Landenberger Foundation to FW. We thank J. Hong for help with sleep recordings and J. Smith and X. Li for help with histology.

## **Author Contributions**

JAS, SC, and FW conceived and designed the study. JAS performed all optogenetic and fiber photometry experiments and analyzed all sleep data. ALS performed optogenetic pilot experiments. JB built the setup for optogenetic sleep recordings including the software to run experiments and the setup for fiber photometry experiments. JAS and FW analyzed the data and wrote the manuscript.

## **Competing Financial Interests**

The authors declare no competing financial interests.

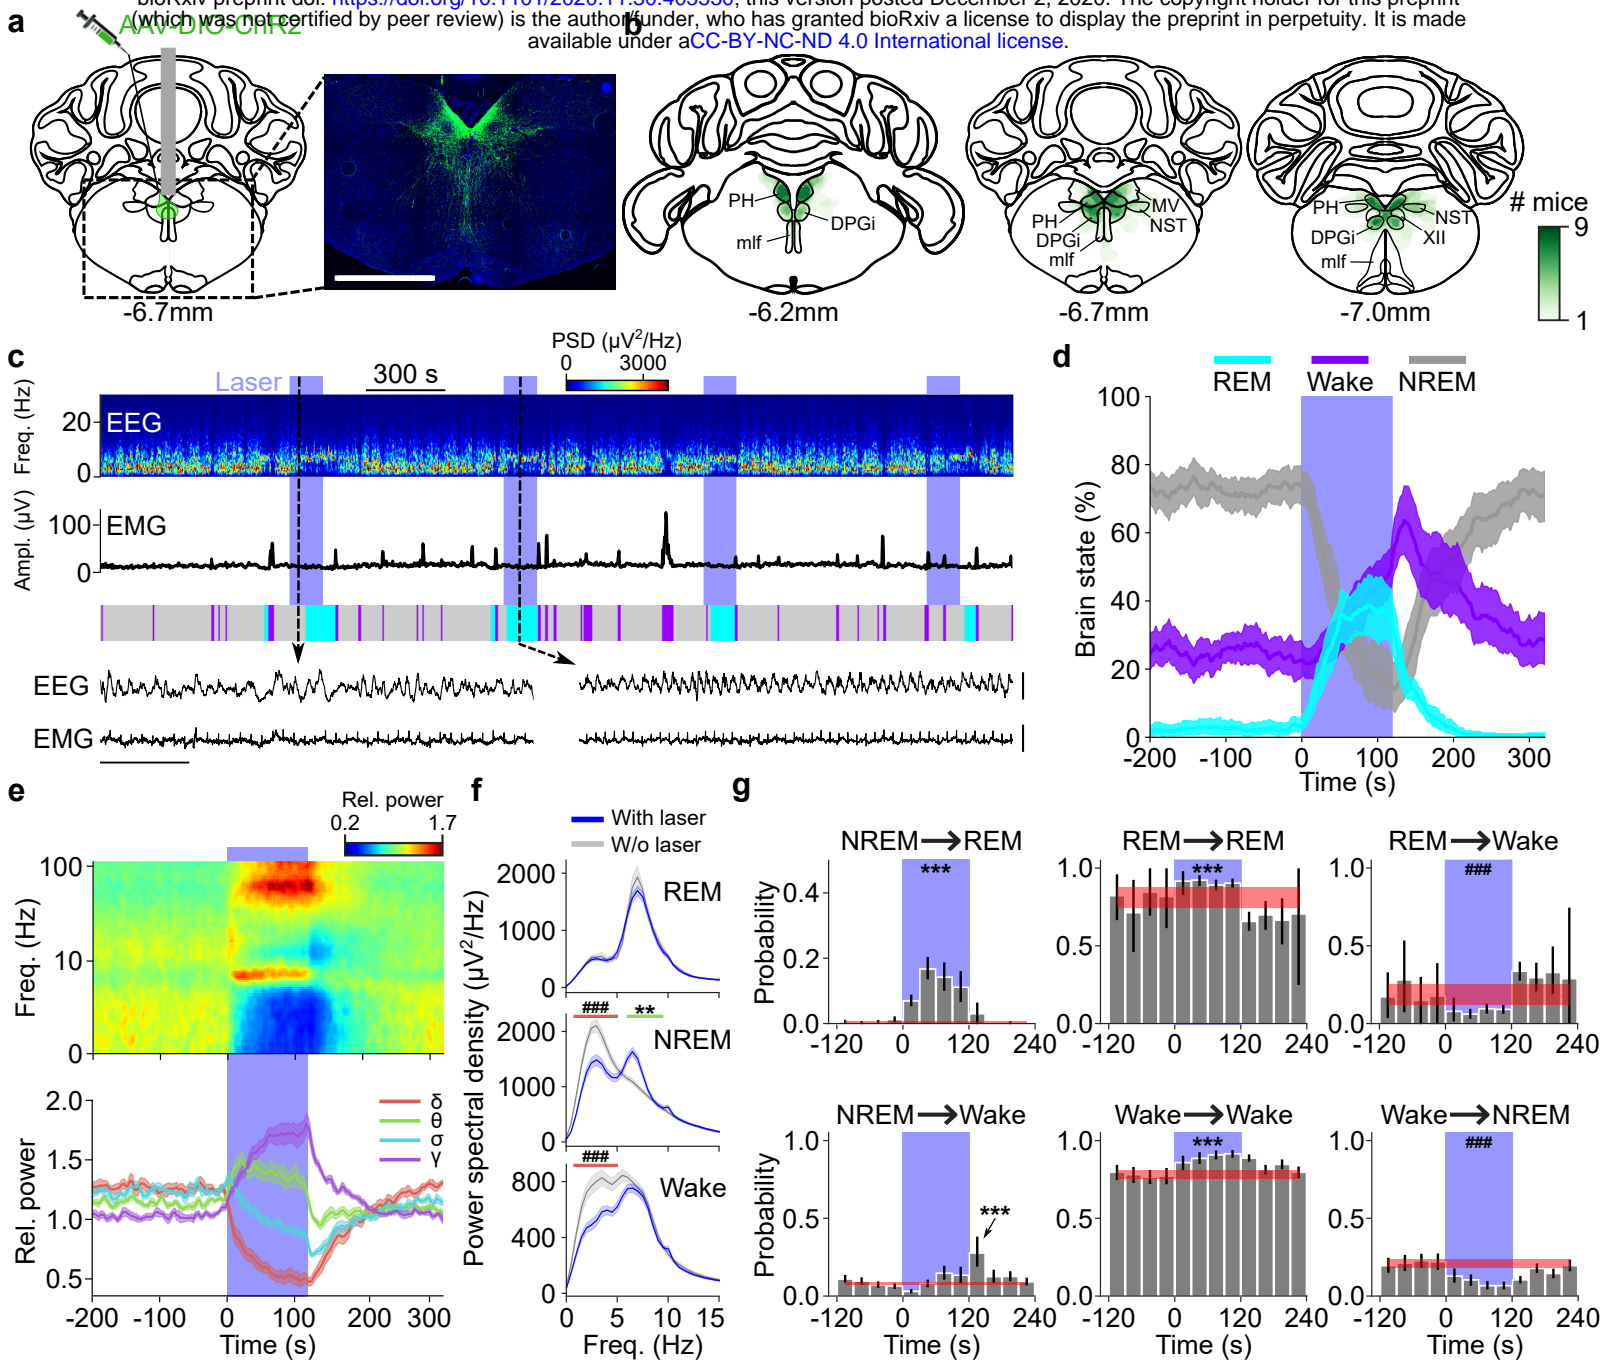

**Figure 1**

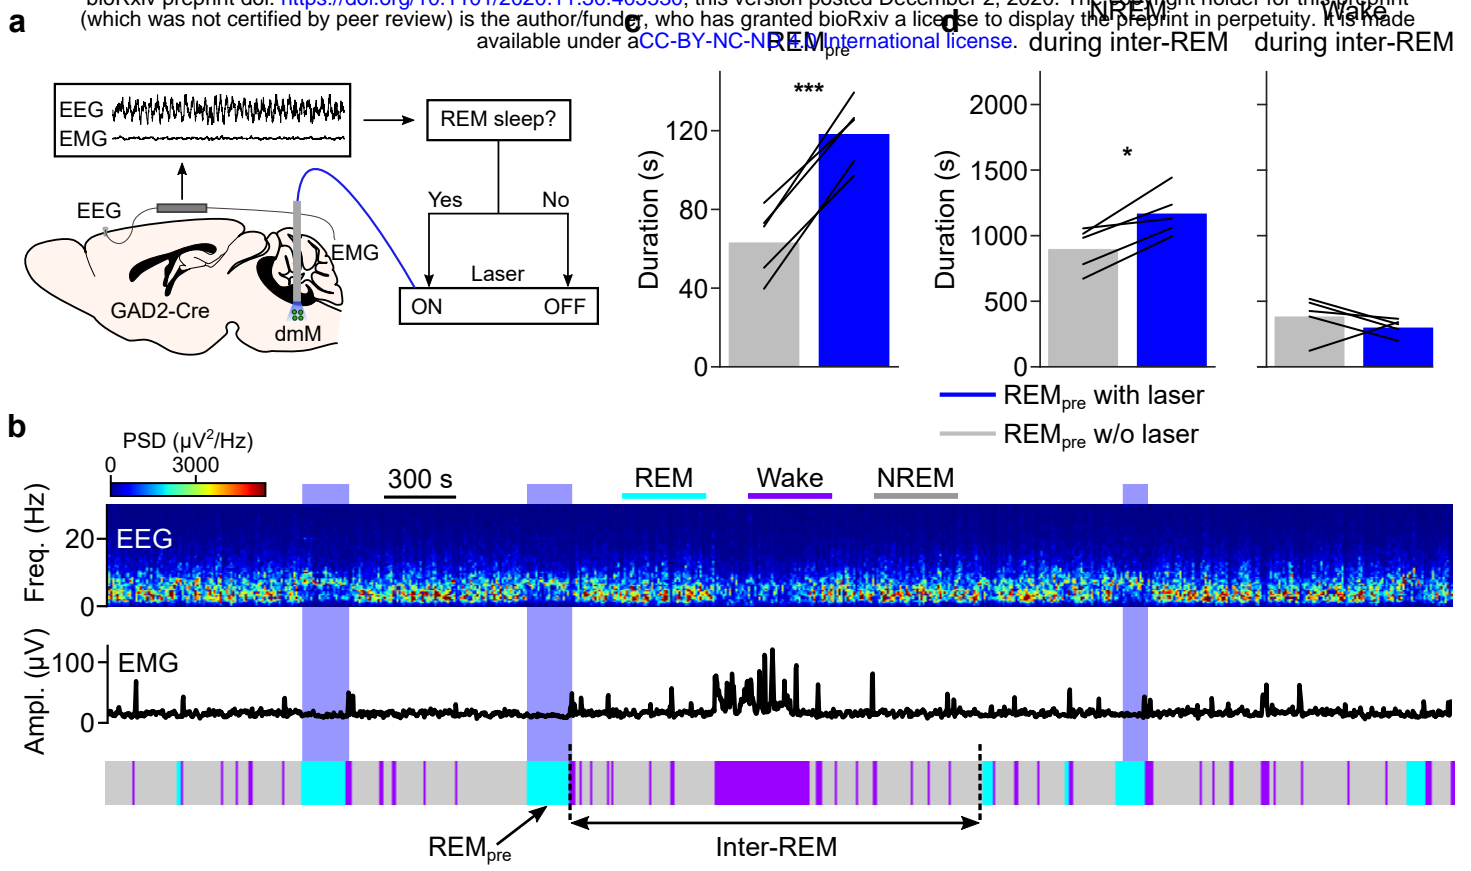

**Figure 2**

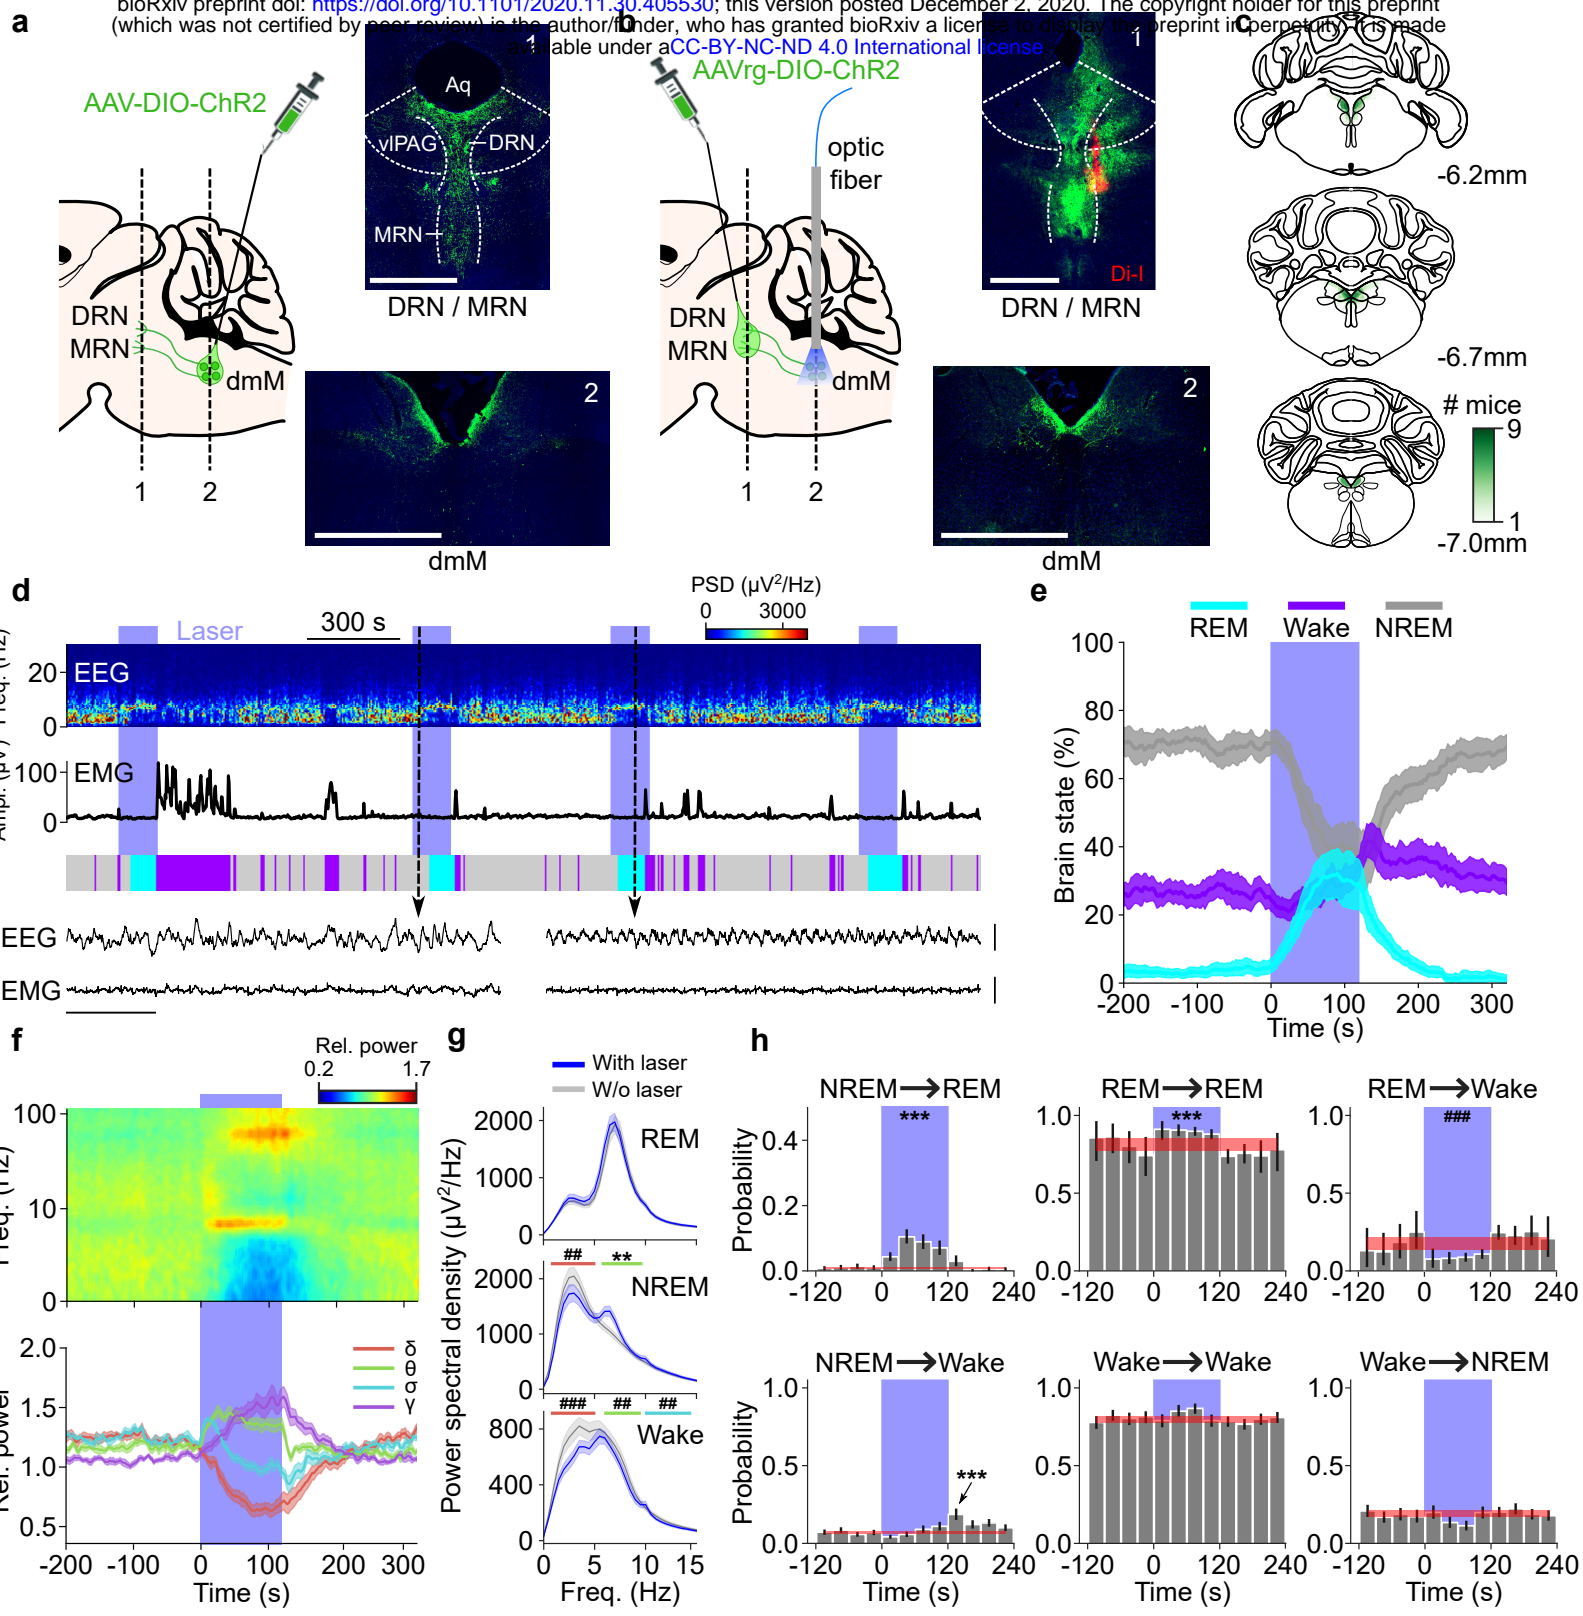

**Figure 3**

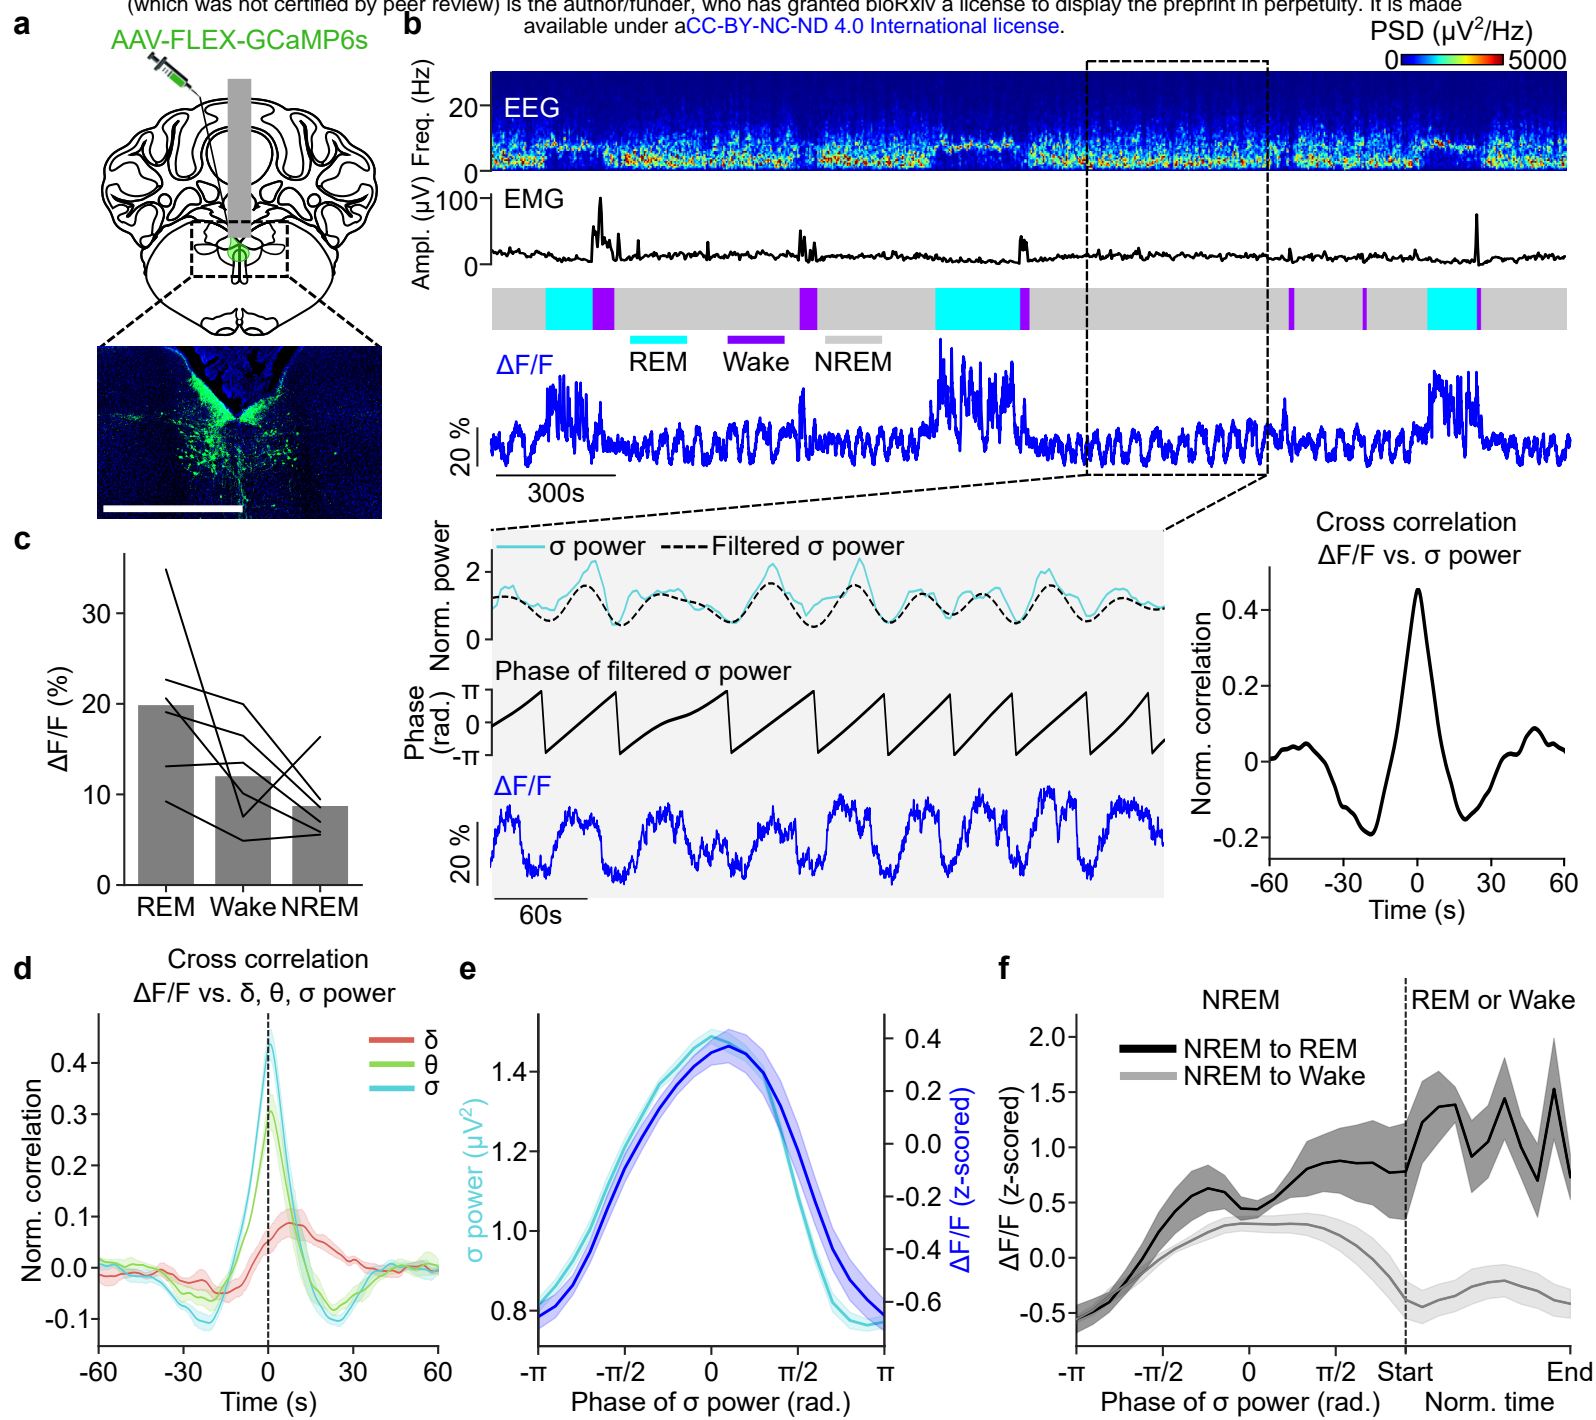

**Figure 4**

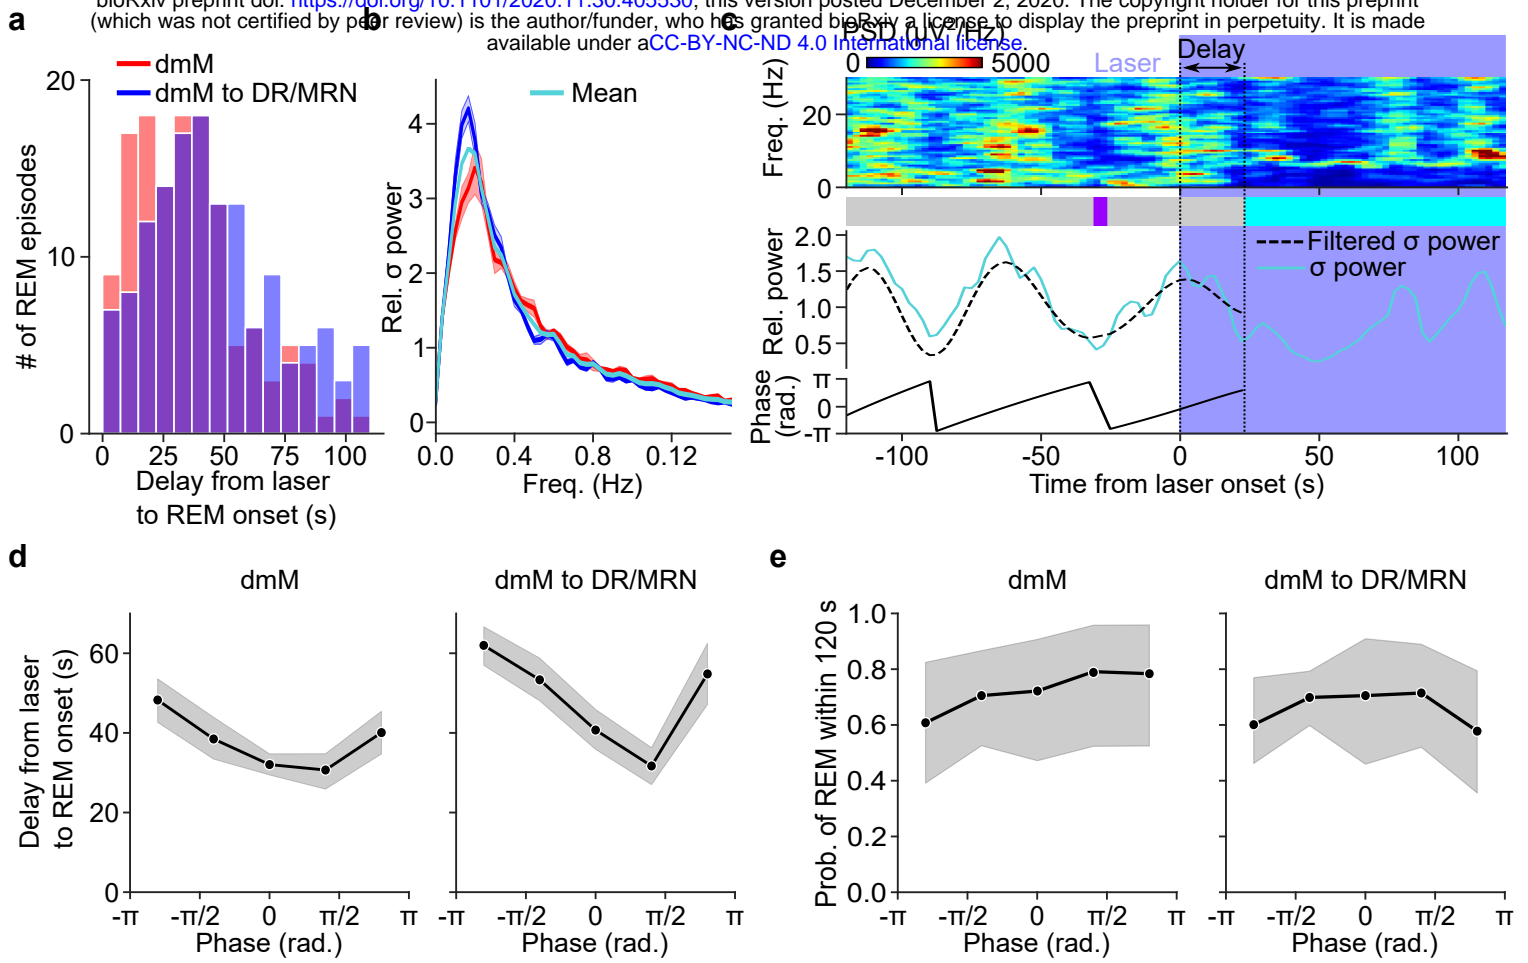

**Figure 5**

## **SUPPLEMENTARY INFORMATION**

### **Regulation of REM Sleep by Inhibitory Neurons in the Dorsomedial Medulla**

Joseph A. Stucynski<sup>1</sup>, Amanda L. Schott<sup>1</sup>, Justin Baik<sup>1</sup>, Shinjae Chung<sup>1</sup>, Franz Weber<sup>1,\*</sup>

<sup>1</sup>Department of Neuroscience, Perelman School of Medicine, Chronobiology and Sleep Institute, University of Pennsylvania, Philadelphia, PA 19104, USA

\*Correspondence: [fweber@pennmedicine.upenn.edu](mailto:fweber@pennmedicine.upenn.edu)



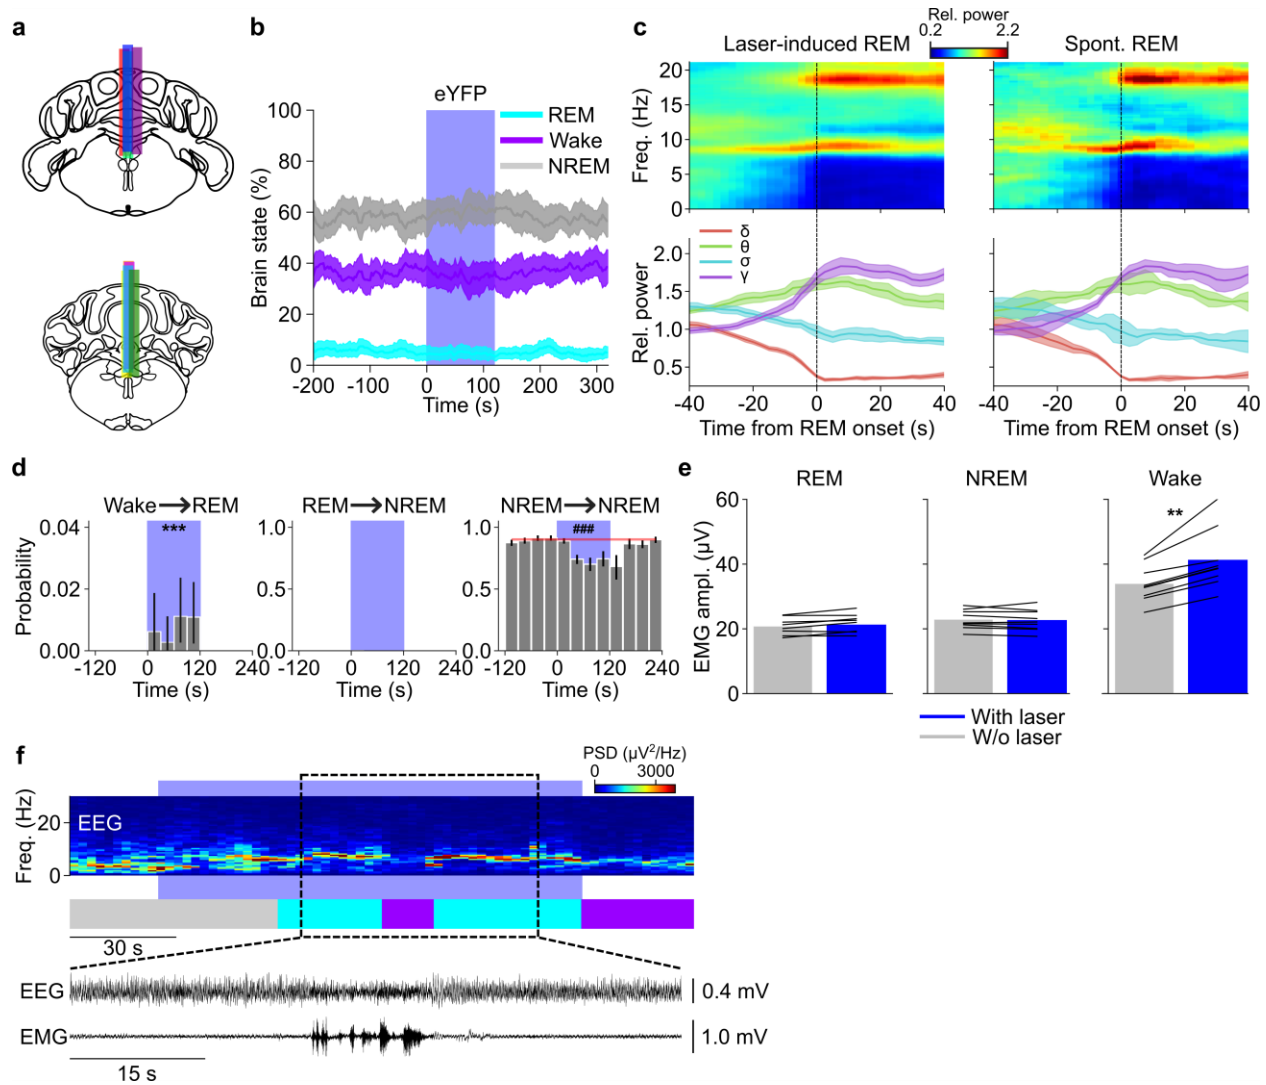

**Supplementary Figure 1. Effects of laser stimulation of dmM GAD2 neurons on EEG and EMG in mice expressing ChR2-eYFP or eYFP.**

**(a)** Location of fiber tracts for optogenetic stimulation experiments. Each colored bar represents the location of an optic fiber used for optogenetic stimulation of dmM GAD2 neurons ( $n = 9$  mice). The coronal brain schemes were adapted from Allen Mouse Brain Atlas (© 2015 Allen Institute for Brain Science. Allen Brain Atlas API. Available from: <http://brain-map.org/api/index.html>). **(b)** Effect of laser stimulation on REMs, NREMs, and wake in eYFP control mice ( $n = 6$ ). Laser stimulation did not significantly change the percentage of any brain state ( $P > 0.233$ , bootstrap). **(c)** Comparison of the EEG spectrogram for laser-induced and spontaneous NREMs to REMs transitions. Left, mean EEG spectrogram before and after a NREMs to REMs transition, averaged across all laser-induced REMs episodes. Each frequency component of the spectrogram was normalized by its mean power across the recording. The mean time course of different power bands (delta, theta, sigma, and gamma) is shown at the bottom. Right, mean EEG spectrogram for spontaneous REMs episodes (not overlapping with laser stimulation) along with the mean time course of delta, theta,



sigma and gamma power during the transition. Time point 0 s corresponds to the transition point. Shadings,  $\pm$  s.e.m. **(d)** Effect of laser stimulation on wake to REMs, REMs to NREMs, and NREMs to NREMs transition probabilities. In rare instances, laser stimulation triggered wake to REMs transitions (Wake  $\rightarrow$  REM,  $P < 0.001$ , bootstrap; see **(f)** for an example). We did not observe any REMs to NREMs transitions during the baseline and laser stimulation interval. The strong increase in NREMs to REMs transitions by optogenetic activation (**Fig. 1g**) resulted in a reduction of NREMs to NREMs transitions (NREM  $\rightarrow$  NREM,  $P < 0.001$ ), i.e. the maintenance of NREMs was impaired during laser stimulation. The red line and shading depict the average baseline transition probability (computed for the interval preceding laser stimulation) and the 95% CI, respectively. Bars, average transition probabilities; error bars, 95% CIs. **\*\*\*/###**  $P < 0.001$  for significant increases / decreases. **(e)** EMG amplitude during REMs, NREMs, and wake with and without (w/o) laser stimulation. Optogenetic activation of dmM GAD2 neurons increased the EMG amplitude during wakefulness, but did not affect the amplitude during REMs, or NREMs (REM,  $P = 0.108$ ,  $T = 1.84$ ; NREM,  $P = 0.751$ ,  $T = -0.33$ ; Wake,  $P = 3.7e-3$ ,  $T = 4.05$ , paired t-test). The left plot (REM) shows data for only 8 mice, as one mouse had no spontaneous REMs episodes. Bars, average across mice; lines, individual mice; **\*\***,  $P < 0.01$ . **(f)** Example of a wake to REMs transition. Shown are EEG spectrogram and hypnogram. The black box indicates an interval for which the EEG and EMG are shown at an expanded time scale. For each observed wake to REMs transition, the wake episode was directly preceded by REMs.

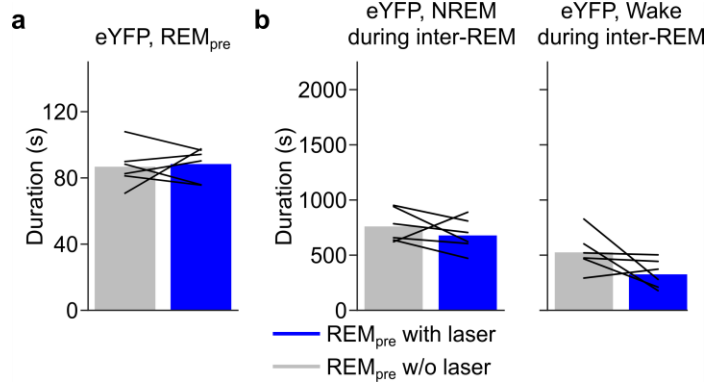

**Supplementary Figure 2. Closed-loop stimulation in eYFP control mice.**

**(a)** Results of closed-loop stimulation in eYFP control mice ( $P = 0.80$ , paired t-test,  $n = 6$  mice). Bars, average across mice; lines, individual mice. **(b)** Effects of laser stimulation on NREMs and wake during inter-REM. Left, total duration of NREMs during inter-REM did not depend on whether the preceding REMs episode overlapped with laser stimulation or not ( $P = 0.351$ , paired t-test). Right, total duration of wake during inter-REM ( $P = 0.109$ , paired t-test). Bars, average across mice; lines, individual mice.

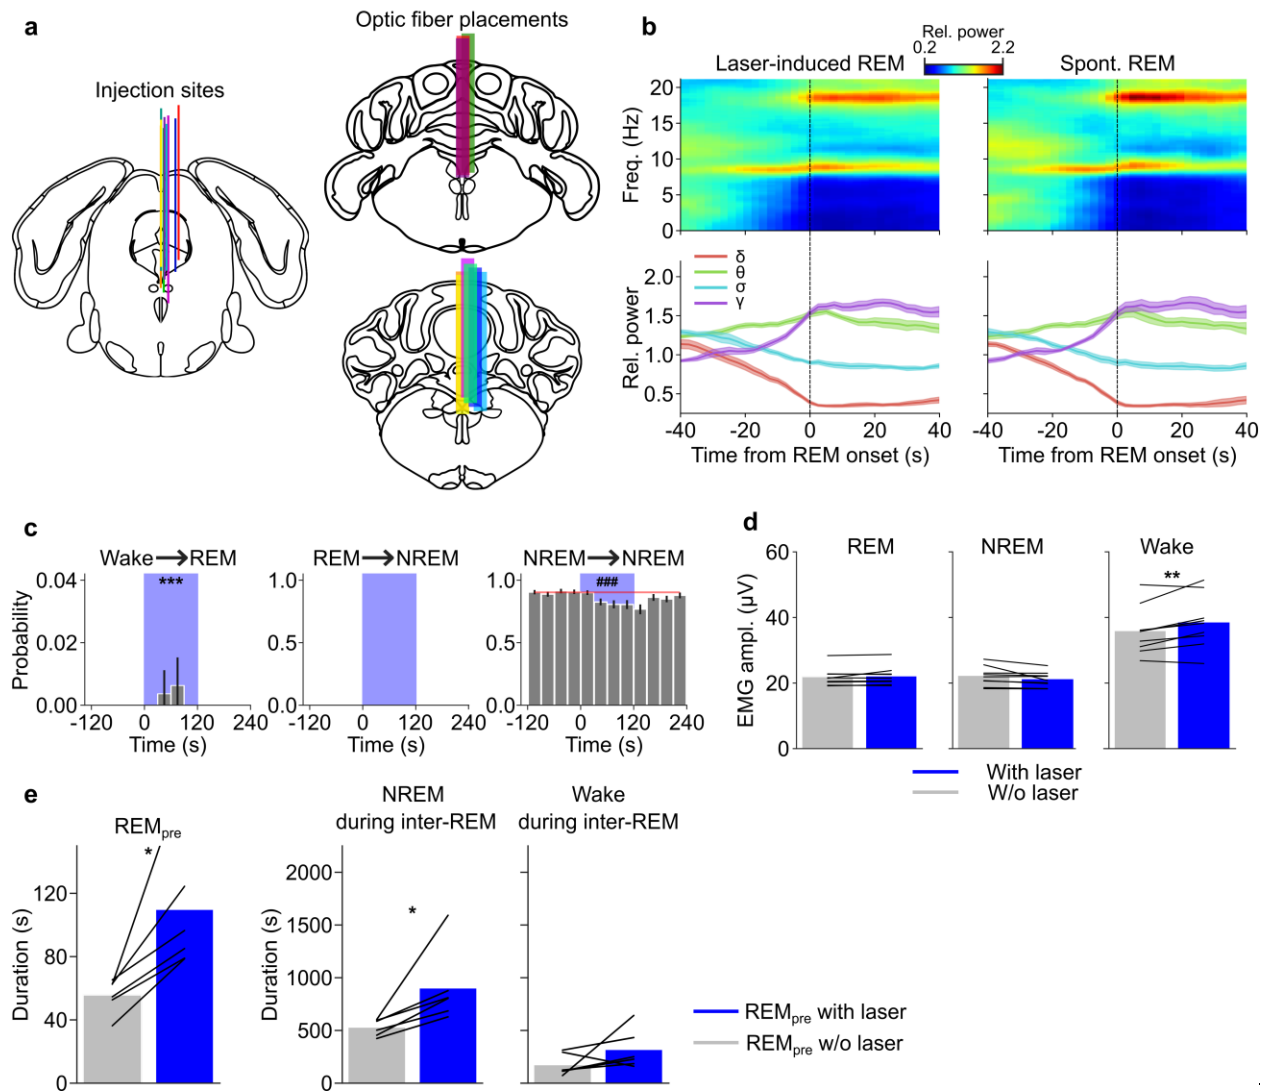

### Supplementary Figure 3. Effects of open and closed-loop stimulation of DR/MRN-projecting dmm neurons.

**(a)** Location of injection site of retro-AAV-DIO-ChR2 into the DR/MRN (left) and placement of optic fiber for optogenetic stimulation in the dmm (right). The location of the injection site was identified using Di-I. **(b)** Comparison of the EEG spectrogram for laser-induced and spontaneous NREMs to REMs transitions. Left, mean EEG spectrogram before and after a NREMs to REMs transition, averaged across all laser-induced REMs episodes. Each frequency component of the spectrogram was normalized by its mean power across the recording. The mean time course of different power bands (delta, theta, sigma, and gamma) is shown at the bottom. Right, mean EEG spectrogram for spontaneous REMs episodes (not overlapping with laser stimulation) along with the mean time course of delta, theta, sigma and gamma power during the transition. Time point 0 s corresponds to the transition point. Shadings,  $\pm$  s.e.m.,  $n = 9$  mice. **(c)** Effect of laser stimulation on wake to REMs, REMs to NREMs, and NREMs to NREMs transition probabilities. Similar to stimulating the whole

population of dmM GAD2 neurons (**Suppl. Fig 1d,f**), laser stimulation of the DR/MRN-projecting neurons triggered wake to REMs transitions in rare instances (Wake → REM,  $P < 0.001$ , bootstrap,  $n = 9$  mice). We did not observe any REMs to NREMs transitions during baseline or laser stimulation intervals. Similar to stimulation of the whole population of dmM GAD2 neurons (**Suppl. Fig 1d**), activation of the DR/MRN-projecting neurons caused a reduction of NREMs to NREMs transitions (NREM → NREM,  $P < 0.001$ ), reflecting an impaired maintenance of NREMs. The red line and shading depict the average baseline transition probability (computed for the interval preceding laser stimulation) and the 95% CI, respectively. Bars, average transition probabilities; error bars, 95% CIs. \*\*\*/###,  $P < 0.001$  for significant increases/decreases. **(d)** EMG amplitude during REMs, NREMs, and wake with and without laser stimulation. Optogenetic activation of DR/MRN-projecting neurons increased the EMG amplitude during wakefulness, but did not affect the amplitude during REMs, or NREMs (REM,  $P = 0.238$ ,  $T = 1.27$ ; NREM,  $P = 0.115$ ,  $T = -1.77$ ; Wake,  $P = 0.005$ ,  $T = 3.80$ , paired t-test). \*\*,  $P < 0.01$ . Bars, average across mice; lines, individual mice. **(e)** Results for closed-loop stimulation of DR/MRN-projecting dmM GAD2 neurons. Left, duration of REMs episodes with and without laser. Closed-loop stimulation significantly prolonged the duration of REMs episodes ( $P = 0.022$ ,  $T = 3.27$ , paired t-test,  $n = 6$  mice). \*,  $P < 0.05$ . REMs episodes overlapping with laser stimulation were followed by a larger total duration of NREMs during the subsequent inter-REM interval ( $P = 0.032$ ,  $T = 2.95$ , paired t-test), while the total duration of wakefulness was not significantly altered ( $P = 0.186$ ,  $T = 1.52$ , paired t-test). Bars, average across mice; lines, individual mice.

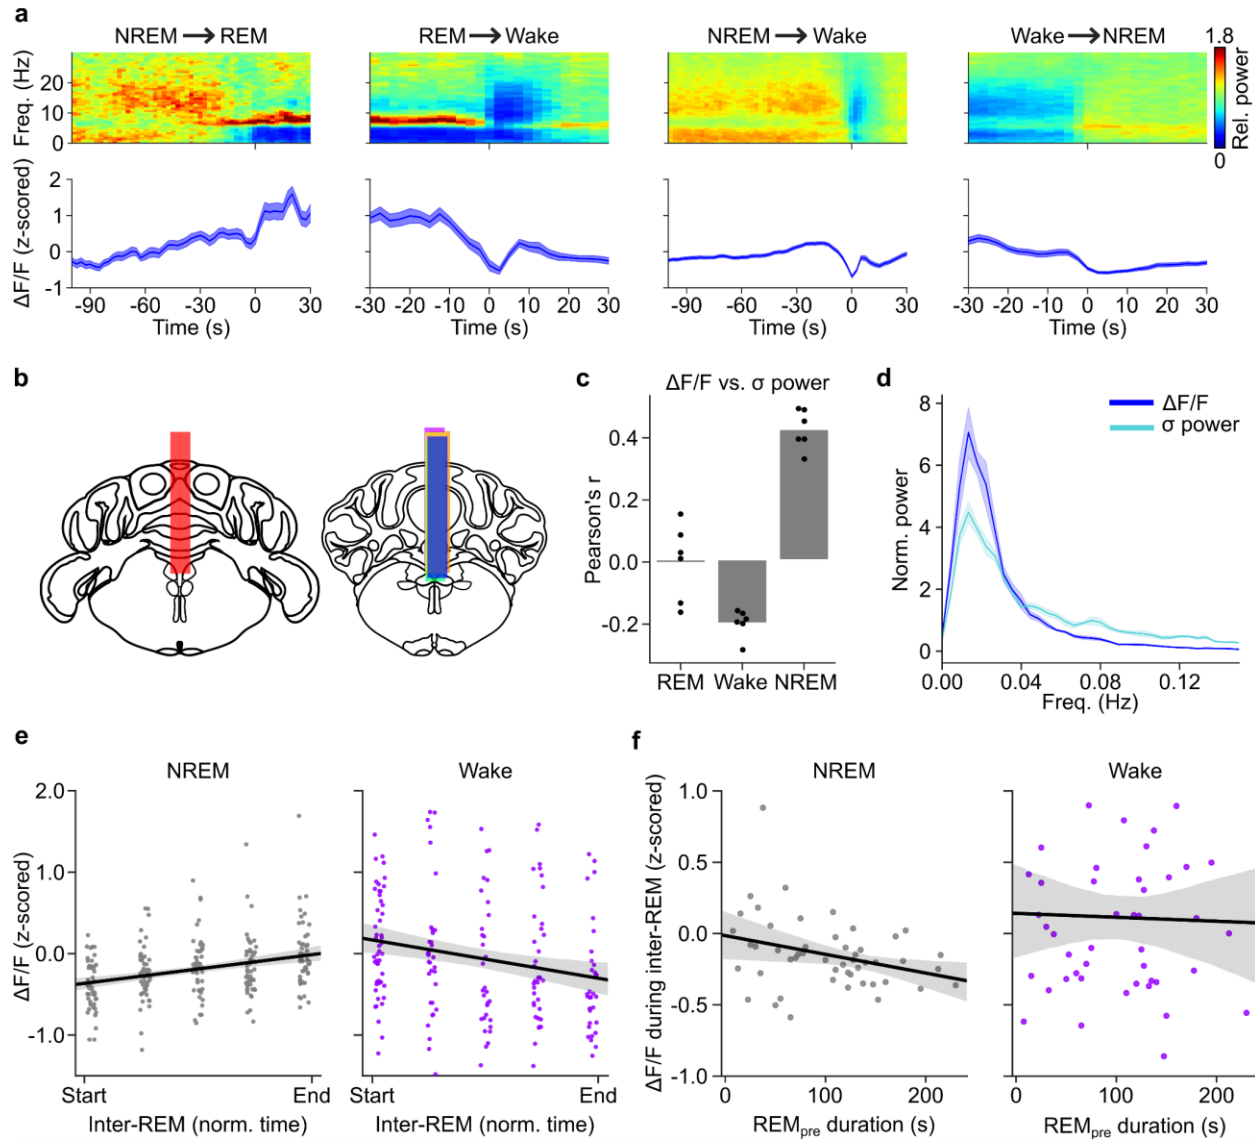

### Supplementary Figure 4. Calcium activity of dmM GAD2 neurons during state transitions, NREMs, and inter-REM.

**(a)** Calcium activity ( $\Delta F/F$ , z-scored) at brain state transitions. For each transition from state X to Y, we ensured that the mouse was in state X for at least 100 s (NREM → REM and NREM → Wake) or 30 s (REM → Wake and Wake → NREM). For NREMs to REMs transitions, the activity was significantly increased 35 s before the actual transition ( $p < 0.05$ , paired t-test with Bonferroni correction for  $n = 62$  NREMs to REMs transitions from 6 mice). We compared the activity in the baseline interval ranging from -100 s to -90 s to consecutive 10 s bins. For REMs to wake transitions, the calcium activity significantly dropped 5 s before the transition ( $n = 63$  transitions). For NREMs to wake transitions, the activity started significantly increasing 35 s before the transition ( $n = 252$  transitions). For wake to NREMs transitions, the activity was significantly reduced 15 s before the transition ( $n = 186$  transitions). **(b)** Each colored bar represents the location of an optic fiber implant for fiber photometry imaging. **(c)** Pearson correlation

between  $\Delta F/F$  and sigma power for REMs, wake, and NREMs. The correlation between the two signals was highest during NREMs ( $P = 1e-6$ ,  $F = 70.73$ , one-way repeated measures ANOVA;  $P < 1e-5$ , Bonferroni correction,  $n = 6$  mice). Dots, individual mice. **(d)** Spectral density of sigma power and  $\Delta F/F$  during NREMs. The power spectral density for both signals was calculated for consolidated bouts of NREMs (episodes  $\geq 120$ s, only interrupted by microarousals, i.e. wake episodes  $\leq 10$  s). The peak frequencies for  $\Delta F/F$  signals and sigma power were  $0.0156 \text{ Hz} \pm 0.0037 \text{ Hz}$  (mean  $\pm$  s.d.) and  $0.0163 \text{ Hz} \pm 0.0036 \text{ Hz}$  and were not significantly different ( $P = 0.36$ ,  $T = 0.42$ , paired t-test,  $n = 6$  mice). Shadings, s.e.m. **(e)** Calcium activity ( $\Delta F/F$ , z-scored) during NREMs and wake states within different segments of the inter-REM interval. Each inter-REM interval (interval between two successive REMs episodes) was normalized in time and divided into five consecutive bins. The activity during NREMs steadily increased throughout inter-REM, while the wake activity decreased (NREM,  $P = 6.85e-7$ ,  $R = 0.31$ ; Wake,  $P = 0.006$ ,  $R = -0.20$ , linear regression fit,  $n = 6$  mice). Single dots represent the NREMs or wake activity of a mouse during the corresponding bin of single inter-REM intervals. Black line and shading, linear regression fit and 95% CI for the regression estimate. **(f)** Correlation between preceding REMs episode duration ( $REM_{pre}$ ) and mean NREMs or wake activity during the subsequent inter-REM interval (NREM,  $P = 0.029$ ,  $R = -0.308$ ; Wake,  $P = 0.846$ ,  $R = -0.028$ , linear regression). Each dot represents the activity from a mouse during a single inter-REM interval. Black line and shading, linear regression fit and 95% CI for the regression estimate.
